# Supplementary material for: Germline BRCA mutation and outcome in young-onset breast cancer (POSH): a prospective cohort study
Source: PubMed Central journal article supplement (PMC5805863; doi:10.1016/s1470-2045(17)30891-4), 2018-02

# THE LANCET Oncology

## Supplementary appendix

This appendix formed part of the original submission and has been peer reviewed.  
We post it as supplied by the authors.

Supplement to: Copson ER, Maishman TC, Tapper WJ, et al. Germline *BRCA* mutation and outcome in young-onset breast cancer (POSH): a prospective cohort study. *Lancet Oncol* 2018; published online Jan 11. [http://dx.doi.org/10.1016/S1470-2045\(17\)30891-4](http://dx.doi.org/10.1016/S1470-2045(17)30891-4).

## Appendix - Tables

**Appendix Table 1: Recruitment by active sites**

List of recruitment number by all active sites in the reported cohort.

| Recruiting Hospital                                  | Principal Investigator                                      | No. recruited |
|------------------------------------------------------|-------------------------------------------------------------|---------------|
| Guys Hospital                                        | Mr. Hisham Hamed                                            | 126           |
| Mount Vernon Hospital                                | Dr. Andreas Makris                                          | 108           |
| Royal South Hants Hospital                           | Dr. Peter Simmonds                                          | 91            |
| Weston Park Hospital                                 | Lucy Birch                                                  | 90            |
| Maidstone Hospital                                   | Dr. Rema Jyothirmayi                                        | 89            |
| Royal Stoke University Hospital                      | Dr. Adrian Murray Brunt                                     | 87            |
| Royal Cornwall Hospital                              | Dr. Duncan Wheatley                                         | 80            |
| Royal Free Hospital                                  | Dr. Jackie Newby                                            | 77            |
| Queen Alexandra Hospital                             | Mr. Constantinos Yiangou                                    | 73            |
| Ninewells Hospital                                   | Professor A.M. Thompson                                     | 68            |
| Southend Hospital                                    | Dr Hafiz Algurafi                                           | 63            |
| The Royal Surrey County Hospital                     | Avril Adams                                                 | 59            |
| Christie Hospital                                    | Prof. Gareth Evans (Genetics) Dr. Andrew Wardley (Oncology) | 53            |
| Wexham Park (formerly Heatherwood & Wexham) Hospital | Dr. Marcia Hall                                             | 53            |
| Royal Derby Hospital                                 | Mr. Mark Sibbering                                          | 50            |
| The James Cook University Hospital                   | Dr. John Hardman                                            | 50            |
| Frenchay Hospital                                    | Mr. Simon Cawthorn/Dr. Mike Shere                           | 49            |
| Velindre Hospital                                    | Professor Peter Barrett-Lee                                 | 45            |
| Belfast City Hospital                                | Dr. Seamus McAleer                                          | 44            |
| Broomfield Hospital                                  | Dr. Saad Tahir                                              | 43            |
| Addenbrookes Hospital                                | Professor Helena Earl                                       | 41            |
| The Great Western Hospital                           | Mr. Marcus Galea                                            | 40            |
| Torbay Hospital                                      | Dr. Peter Bliss                                             | 38            |
| Countess of Chester Hospital NHS Trust               | Mrs Claudia Harding-Mckean                                  | 37            |
| Norfolk & Norwich University Hospital NHS Trust      | Dr. Adrian Harnett                                          | 36            |
| Milton Keynes Hospital NHS Trust                     | Miss Amanda Taylor                                          | 34            |
| Withington Hospital                                  | Dr. Anne Armstrong                                          | 32            |
| Royal Marsden Hospital                               | Prof. Ros Eeles                                             | 31            |
| Peterborough Hospital NHS Trust                      | Dr. Karen McAdam                                            | 30            |
| Salisbury Healthcare NHS Trust                       | Dr. Clare Crowley                                           | 30            |
| Manor Hospital                                       | Dr. Inderajit Fernando                                      | 29            |
| Royal Berkshire Hospital                             | Dr Madhumita Bhattachayya                                   | 29            |
| The Hillingdon Hospital NHS Trust                    | Dr. Amy Guppy                                               | 29            |
| Hope Hospital                                        | Miss Zahida Saad                                            | 27            |
| Macclesfield District General Hospital               | Mr. Jalal Kokan                                             | 27            |
| Nottingham City Hospital                             | Mr. R. Douglas Macmillan                                    | 27            |
| Glan Clwyd Hospital                                  | Dr. Jill Bishop                                             | 26            |
| George Eliot Hospital NHS Trust                      | Dr. Susan Lupton                                            | 25            |
| North Hampshire Hospital                             | Miss Anne Stebbing                                          | 25            |
| Royal Devon and Exeter Hospital                      | Dr. Anne Hong                                               | 25            |
| Royal Bournemouth Hospital                           | Mr. Anthony Skene                                           | 24            |
| Stepping Hill Hospital                               | Mr. Mohammad Sharif                                         | 24            |
| Wrexham Maelor Hospital                              | Dr Win Soe                                                  | 24            |
| Isle of Wight NHS Primary Care Trust                 | Dr. Jenny Marshall                                          | 23            |
| Lister Hospital                                      | Dr. Nihal Shah                                              | 22            |
| Royal Victoria Infirmary                             | Dr. Radha Todd                                              | 22            |
| Croydon University Hospital (Mayday Hospital)        | Dr. Navita Somaiah                                          | 21            |
| Royal Sussex County Hospital                         | Dr. David Bloomfield                                        | 21            |
| Surrey & Sussex Healthcare NHS Trust                 | Miss Shamaela Waheed                                        | 21            |
| Whittington Hospital                                 | Prof. Jayant Vaidya                                         | 21            |
| Yeovil District Hospital                             | Dr. G.E Sparrow                                             | 21            |
| Barts & The London NHS Trust                         | Professor Peter Schmid                                      | 19            |
| Derriford Hospital                                   | Dr. Steve Kelly                                             | 19            |
| Grantham & District Hospital                         | Mr. Jibril A. Jibril                                        | 19            |
| Royal Hampshire County Hospital                      | Mr. D. Rainsbury                                            | 19            |
| Walsgrave Hospital                                   | Professor Robert J Grieve                                   | 19            |
| Worthing Hospital                                    | Mr. R. Bonomi                                               | 19            |
| Queen's Hospital, Burton                             | Mr. Colin Rogers                                            | 18            |
| St Georges' Hospital                                 | Dr. Laura Assersohn                                         | 18            |
| Huddersfield Royal Infirmary                         | Dr. Jonathan K Joffe                                        | 17            |
| Kent & Canterbury Hospital                           | Dr. Natasha Mithal                                          | 17            |
| Poole Hospital NHS Trust                             | Miss Abigail Evans                                          | 17            |
| Stirling Royal Infirmary                             | Judith Fraser                                               | 17            |
| Sunderland Royal Hospital                            | Mr Obiukwu Iwuchukwu (until 2015)                           | 17            |
| Dorset County Hospital                               | Sarah Williams                                              | 16            |
| North Middlesex University Hospital                  | Dr. Fharat Raja                                             | 16            |
| Royal Albert Edward Infirmary                        | Dr Elena Takeuchi                                           | 16            |
| Solihull Hospital                                    | Dr Medy Tsalic                                              | 16            |
| Whipps Cross University Hospital                     | Mr. Peter Frecker                                           | 16            |

| <b>Recruiting Hospital</b>                                    | <b>Principal Investigator</b> | <b>No. recruited</b> |
|---------------------------------------------------------------|-------------------------------|----------------------|
| Frimley Park Hospital                                         | Mr. Ian Laidlaw               | 15                   |
| New Cross Hospital                                            | Dr. Rakesh Mehra              | 15                   |
| Royal Liverpool University Hospital                           | Mr. Chris Holcombe            | 15                   |
| University Hospital of Hartlepool                             | Mr. Pud Bhaskar               | 15                   |
| Withybush General Hospital                                    | Dr. Gianfilippo Bertelli      | 15                   |
| Darlington Memorial Hospital                                  | Dr. Alison Humphreys          | 14                   |
| Royal Preston Hospital                                        | Dr. Elaine Young              | 14                   |
| Warwick Hospital                                              | Dr. Nawaz Walji               | 14                   |
| William Harvey Hospital                                       | Dr. Natasha Mithal            | 14                   |
| King George Hospital                                          | Dr. Eliot Sims                | 13                   |
| Newham University Hospital NHS Trust                          | Professor Peter Schmid        | 13                   |
| Russells Hall Hospital                                        | Dr. Rozenn Allerton           | 13                   |
| Charing Cross Hospital                                        | Professor Charles Coombes     | 12                   |
| Darent Valley Hospital                                        | Dr. Julia Hall                | 12                   |
| Friarage Hospital                                             | Dr. Johannes Van Der Voet     | 12                   |
| North Devon District Hospital                                 | Dr. Mark Napier               | 12                   |
| Cumberland Infirmary                                          | Mr. M. Williams               | 11                   |
| The Shrewsbury & Telford Hospital (formerly Royal Shrewsbury) | Dr. Rajiv Agrawal             | 11                   |
| Stoke Mandeville Hospital                                     | Dr. Ketan Shah                | 11                   |
| Wycombe Hospital                                              | Dr. Ketan Shah                | 11                   |
| Kidderminster Hospital                                        | Dr. Mark Churn                | 10                   |
| Queens Hospital (Oldchurch Hospital)                          | Dr. Mary Quigley              | 10                   |
| Sandwell Hospital                                             | Dr. David Spooner             | 10                   |
| St. Richard's Hospital                                        | Dr. Joanna Gale               | 10                   |
| Stafford General Hospital                                     | Dr. Adrian Murray Brunt       | 10                   |
| Luton & Dunstable Hospital NHS Foundation Trust               | Dr. Mei-Lin Ah-See            | 9                    |
| University College London                                     | Dr. Grant Stewart (to 2012)   | 9                    |
| Homerton University Hospital NHS Foundation Trust (c/o Barts) | Professor Peter Schmid        | 8                    |
| James Paget Healthcare NHS Trust                              | Dr. Adrian Harnett            | 7                    |
| North Tyneside General Hospital                               | Mr. Mike Carr                 | 7                    |
| Queen Elizabeth Hospital, Gateshead                           | Mr. David Browell             | 7                    |
| Royal Glamorgan Hospital                                      | Dr. Jacinta Abraham           | 7                    |
| Royal Lancaster Infirmary                                     | Dr. David Eaton               | 7                    |
| Royal Oldham                                                  | Dr. Juliette Loncaster        | 7                    |
| Birmingham City Hospital                                      | Dr. David Spooner             | 6                    |
| Gwynedd Hospital (North West Wales)                           | Dr. Jill Bishop               | 6                    |
| Lincoln County Hospital                                       | Mr. Jibril A. Jibril          | 6                    |
| South Tyneside District Hospital                              | Dr. Radha Todd                | 6                    |
| The Alexandra Hospital                                        | Dr. Clive Irwin               | 6                    |
| The Leeds Teaching Hospital NHS Trust                         | Dr. Julian Adlard             | 6                    |
| Princess Royal University Hospital                            | Dr. Mark Harries              | 5                    |
| Wansbeck General Hospital                                     | Mr. Mike Carr                 | 5                    |
| West Suffolk Hospital                                         | Dr. Margaret Moody            | 5                    |
| West Wales General                                            | Dr. Margaret Wilkins          | 5                    |
| Conquest Hospital                                             | Dr. Gillian Sadler            | 4                    |
| Royal Alexandra Hospital                                      | Dr. Abdulla Al-hasso          | 4                    |
| Singleton Hospital                                            | Dr. Gianfilippo Bertelli      | 4                    |
| Furness General Hospital                                      | Dr. Geraldine Skailes         | 3                    |
| Queen Elizabeth The Queen Mother Hospital                     | Dr. Natasha Mithal            | 3                    |
| Bronglais Hospital                                            | Sarah J Jones                 | 2                    |
| Burnley General Hospital                                      | Dr. Martin Hogg               | 2                    |
| Kings College London                                          | Dr. Anne Rigg                 | 2                    |
| University Hospital of North Tees                             | Mr. Colm Hennessy             | 2                    |
| Blackburn Royal Infirmary                                     | Dr. Martin Hogg               | 1                    |
| Princess Elizabeth Hospital                                   | Dr. Peter Gomes               | 1                    |
| Queen Elizabeth Hospital, Woolwich                            | Dr. Hartmut Kristeleit        | 1                    |
| Southern General Hospital                                     | Dr. Abdulla Al-hasso          | 1                    |

## Appendix Table 2: List of BRCA1 and BRCA2 mutation annotation

List of 338 pathogenic BRCA1 and BRCA2 variants included in the BRCA+ group

| GENE  | Coding change        | Protein change     |
|-------|----------------------|--------------------|
| BRCA1 | c.514delC            | p.Gln172fs         |
| BRCA1 | c.1961dupA           | p.Lys654fs         |
| BRCA1 | c.3762_3763het_delGA | p.Cys1252fs        |
| BRCA1 | c.135-1G>T           |                    |
| BRCA1 | c.3400G>T            | p.Glu1134X         |
| BRCA1 | c.3607C>T            | p.Arg1203X         |
| BRCA1 | c.53T>C              | p.Met18Thr         |
| BRCA1 | c.5153G>A            | p.Trp1718X         |
| BRCA1 | c.302-1G>T           |                    |
| BRCA1 | c.4185+1G>T          |                    |
| BRCA1 | c.2680_2681del       | p.Lys894fs         |
| BRCA1 | c.69_79del           | p.Cys24fs          |
| BRCA1 | c.4065_4068delTCAA   | p.Asn1355fs        |
| BRCA1 | c.4185+1G>T          |                    |
| BRCA1 | c.4357+2T>G          |                    |
| BRCA1 | c.3967C>T            | p.Gln1323X         |
| BRCA1 | c.4065_4068delTCAA   | p.Asn1355fs        |
| BRCA1 | c.4180delA           | p.Thr1394fs        |
| BRCA1 | c.3668_3669insTCCC   | p.Leu1223fs        |
| BRCA1 | c.1675delA           | p.Lys519Argfs      |
| BRCA1 | c.427G>T             | p.Glu143X          |
| BRCA1 | c.4065_4068delTCAA   | p.Asn1355fs        |
| BRCA1 | c.5503C>T            | p.Arg1835X         |
| BRCA1 | c.427G>T             | p.Glu143X          |
| BRCA1 | c.4357+6T>C          |                    |
| BRCA1 | c.1793T>G            | p.Leu598X          |
| BRCA1 | c.5152+1G>T          |                    |
| BRCA1 | c.1954dupA           | p.Lys652fs         |
| BRCA1 | c.5152+1G>T          |                    |
| BRCA1 | c.3751_3754delGTCT   | p.Cys1252fs        |
| BRCA1 | c.3768_3769del       | p.Glu1257Glyfs     |
| BRCA1 | c.5152+1G>T,         |                    |
| BRCA1 | c.3751_3754delGTCT   | p.Cys1252fs        |
| BRCA1 | c.A4558T             | p.R1520X           |
| BRCA1 | c.5194-12G>A         |                    |
| BRCA1 | c.4574_4575delAA     | p.Gln1525Argfs     |
| BRCA1 | c.5194-12G>A         |                    |
| BRCA1 | c.5332+1G>A          |                    |
| BRCA1 | c.929delA            | p.Gln310fs         |
| BRCA1 | c.427G>T             | p.Glu143X          |
| BRCA1 | c.4574_4575delAA     | p.Gln1525Argfs     |
| BRCA1 | c.5264dupC           | p.Ser1755fs        |
| BRCA1 | c.1512dupT           | p.Arg504fs         |
| BRCA1 | c.427G>T             | p.Glu143X          |
| BRCA1 | c.1266T>G            | p.Tyr422X          |
| BRCA1 | c.1A>G               | p.Met1Val          |
| BRCA1 | c.5153G>A            | p.Trp1718X         |
| BRCA1 | c.1823_1826delAGAA   | p.Lys608fs         |
| BRCA1 | c.4586dupT           | p.I1529fs          |
| BRCA1 | c.4327C>T            | p.Arg1443X         |
| BRCA1 | c.3751_3754delGTCT   | p.Cys1252fs        |
| BRCA1 | c.547+2T>A           |                    |
| BRCA1 | c.2068delA           | p.Lys690fs         |
| BRCA1 | c.2475delC           | p.Asp825fs         |
| BRCA1 | c.4065_4068delTCAA   | p.Asn1355fs        |
| BRCA1 | c.4065_4068delTCAA   | p.Asn1355fs        |
| BRCA1 | c.3331_3334del       | p.(Gln1111Asnfs*5) |
| BRCA1 | c.2612_2613insT      | p.Pro871fs         |
| BRCA1 | c.2074delC           | p.His692fs         |
| BRCA1 | c.5264dupC           | p.Ser1755fs        |
| BRCA1 | c.2676_2679del       | p.Lys893fs         |
| BRCA1 | c.3718C>T            | p.Gln1240X         |
| BRCA1 | c.5264dupC           | p.Ser1755fs        |
| BRCA1 | c.1297_1298insCC     | p.Ala433fs         |
| BRCA1 | c.68-69delAG         | p..Glu23Valfs      |
| BRCA1 | c.4065_4068delTCAA   | p.Asn1355fs        |
| BRCA1 | c.181T>G             | p.Cys61Gly         |
| BRCA1 | c.3751_3754delGTCT   | p.Cys1252fs        |
| BRCA1 | c.5193delG           | p.E1731fs          |
| BRCA1 | Deletion exon 1-23   |                    |
| BRCA1 | Deletion exon 1-23   |                    |
| BRCA1 | c.4065_4068delTCAA   | p.Asn1355fs        |

| <b>GENE</b>  | <b>Coding change</b>    | <b>Protein change</b> |
|--------------|-------------------------|-----------------------|
| <i>BRCA1</i> | c.66dupA                | p.Leu22fs             |
| <i>BRCA1</i> | c.68-69delAG            | p..Glu23Valfs         |
| <i>BRCA1</i> | c.1141A>T               | p.Lys381X             |
| <i>BRCA1</i> | c.2125_2126insA         | p.Phe709fs            |
| <i>BRCA1</i> | c.68-69delAG            | p..Glu23Valfs         |
| <i>BRCA1</i> | c.5186delT              | p.Leu1729fs           |
| <i>BRCA1</i> | c.3228_3229del          | p.(Gly1077Alafs*8)    |
| <i>BRCA1</i> | c.68-69delAG            | p..Glu23Valfs         |
| <i>BRCA1</i> | c.2676_2679del          | p.Lys893fs            |
| <i>BRCA1</i> | Deletion exon 20        |                       |
| <i>BRCA1</i> | c.4411delG              | p.Gly1471fs           |
| <i>BRCA1</i> | c.3331_3334del          | p.(Gln1111Asnfs*5)    |
| <i>BRCA1</i> | c.2704delG              | p.Glu902fs            |
| <i>BRCA1</i> | Deletion exon 21-24     |                       |
| <i>BRCA1</i> | c.68-69delAG            | p..Glu23Valfs         |
| <i>BRCA1</i> | c.3331_3334delCAAG      | p.Gln1111Asnfs        |
| <i>BRCA1</i> | Deletion exon 21-24     |                       |
| <i>BRCA1</i> | c.3002delA              | p.Glu1001fs           |
| <i>BRCA1</i> | c.5054C>T               | p.Thr1685Ile          |
| <i>BRCA1</i> | c.4065_4068delTCAA      | p.Asn1355fs           |
| <i>BRCA1</i> | c.1012A>T               | p.Lys338X             |
| <i>BRCA1</i> | c.3064dupA              | p.Thr1022fs           |
| <i>BRCA1</i> | c.5363G>T               | p.Gly1788Val          |
| <i>BRCA1</i> | c.303T>G                | p.Tyr101X             |
| <i>BRCA1</i> | Deletion of exon 20     |                       |
| <i>BRCA1</i> | c.69_79del              | p.Cys24fs             |
| <i>BRCA1</i> | c.5264dupC              | p.Ser1755fs           |
| <i>BRCA1</i> | Deletion of exon 24     |                       |
| <i>BRCA1</i> | c.520delC               | p.Gln174fs            |
| <i>BRCA1</i> | c.2680_2681del          | p.Lys894fs            |
| <i>BRCA1</i> | c.427G>T                | p.Glu143X             |
| <i>BRCA1</i> | Deletion of exon 3      |                       |
| <i>BRCA1</i> | c.2680_2681del          | p.Lys894fs            |
| <i>BRCA1</i> | Deletion of exon 3      |                       |
| <i>BRCA1</i> | c.3228_3229del          | p.(Gly1077Alafs*8)    |
| <i>BRCA1</i> | c.3400G>T               | p.Glu1134X            |
| <i>BRCA1</i> | c.4065_4068delTCAA      | p.Asn1355fs           |
| <i>BRCA1</i> | c.4357delG              | p.A1453fs             |
| <i>BRCA1</i> | Deletion of exons 1-17  |                       |
| <i>BRCA1</i> | Deletion of exons 1-17  |                       |
| <i>BRCA1</i> | Deletion of exons 1-17  |                       |
| <i>BRCA1</i> | Deletion of exons 1-17  |                       |
| <i>BRCA1</i> | c.181T>G                | p.Cys61Gly            |
| <i>BRCA1</i> | Deletion of exons 1-2   |                       |
| <i>BRCA1</i> | c.1954dupA              | p.Lys652fs            |
| <i>BRCA1</i> | c.1961delA              | p.Lys654fs            |
| <i>BRCA1</i> | c.1326T>A               | p.Cys442X             |
| <i>BRCA1</i> | c.4354A>T               | p.Lys1452X            |
| <i>BRCA1</i> | Deletion of exons 1-2   |                       |
| <i>BRCA1</i> | Deletion of exons 1-2   |                       |
| <i>BRCA1</i> | c303T>G                 | p.Tyr101Ter           |
| <i>BRCA1</i> | c.1954delA              | p.Lys652fs            |
| <i>BRCA1</i> | c.2475delC              | p.Asp825fs            |
| <i>BRCA1</i> | c.1471C>T               | p.Gln491X             |
| <i>BRCA1</i> | c.3751_3754delGTCT      | p.Cys1252fs           |
| <i>BRCA1</i> | c.3869_3870delAA        | p.Arg1290fs           |
| <i>BRCA1</i> | c.3751_3754delGTCT      | p.Cys1252fs           |
| <i>BRCA1</i> | c.68-69delAG            | p..Glu23Valfs         |
| <i>BRCA1</i> | c.5251C>T               | p.Arg1751Ter          |
| <i>BRCA1</i> | c.5153G>A               | p.Trp1718X            |
| <i>BRCA1</i> | c.5503C>T               | p.Arg1835X            |
| <i>BRCA1</i> | c.427G>T                | p.Glu143X             |
| <i>BRCA1</i> | c.4964_4982del          | p.(Ser1655Tyrfs*16)   |
| <i>BRCA1</i> | c.4574_4575delAA        | p.Gln1525Argfs        |
| <i>BRCA1</i> | Deletion of exons 14-17 |                       |
| <i>BRCA1</i> | c.1961dupA              | p.Lys654fs            |
| <i>BRCA1</i> | c.1601_1602delAG        | p.Gln534fs-X3         |
| <i>BRCA1</i> | Deletion of exons 1a-1b |                       |
| <i>BRCA1</i> | c.4065_4068delTCAA      | p.Asn1355fs           |
| <i>BRCA1</i> | c.427G>T                | p.Glu143X             |
| <i>BRCA1</i> | c.1749_1755del          | p.(Lys583Asnfs*3)     |
| <i>BRCA1</i> | Deletion of exons 1a-2  |                       |
| <i>BRCA1</i> | c.1504_1508del          | p.(Leu502Alafs*2)     |
| <i>BRCA1</i> | c.2199delG              | p.Glu733fs            |
| <i>BRCA1</i> | Deletion of exons 1A-2  |                       |

| <b>GENE</b>  | <b>Coding change</b>    | <b>Protein change</b> |
|--------------|-------------------------|-----------------------|
| <i>BRCA1</i> | c.5503C>T               | p.Arg1835X            |
| <i>BRCA1</i> | Deletion of exons 20    |                       |
| <i>BRCA1</i> | c.5324T>G               | p.Met1775Arg          |
| <i>BRCA1</i> | Deletion of exons 21-24 |                       |
| <i>BRCA1</i> | c.1949_1950delTA        | p.Ile650fs]           |
| <i>BRCA1</i> | c.5264dupC              | p.Ser1755fs           |
| <i>BRCA1</i> | c.2267delG              | p.Arg756fs            |
| <i>BRCA1</i> | c.5573delT              | p.I1858fs             |
| <i>BRCA1</i> | c.5324T>G               | p.Met1775Arg          |
| <i>BRCA1</i> | c.4574_4575delAA        | p.Gln1525Argfs        |
| <i>BRCA1</i> | Deletion of exons 8-13  |                       |
| <i>BRCA1</i> | c.4349C>G               | p.Ser1450X            |
| <i>BRCA1</i> | c.4106delC              | p.Ala1369fs           |
| <i>BRCA1</i> | c.3046_3047insATGAG     | p.Asn1016fs           |
| <i>BRCA1</i> | c.3400G>T               | p.Glu1134X            |
| <i>BRCA1</i> | c.2953delC              | p.Pro985fs            |
| <i>BRCA1</i> | c.187_188delAG          | p.Glu23Valfs          |
| <i>BRCA1</i> | Duplication of exon 13  |                       |
| <i>BRCA1</i> | c.4065_4068delTCAA      | p.Asn1355fs           |
| <i>BRCA1</i> | c.68-69delAG            | p..Glu23Valfs         |
| <i>BRCA1</i> | c.4165_4166delAG        | p.Ser1389X            |
| <i>BRCA1</i> | c.3450_3453delCAAG      | p.Gln1111fs           |
| <i>BRCA1</i> | c.981_982del            | p.Cys328Terfs         |
| <i>BRCA1</i> | c.427G>T                | p.Glu143X             |
| <i>BRCA1</i> | Duplication of exon 13  |                       |
| <i>BRCA1</i> | c.2068delA              | p.Lys690fs            |
| <i>BRCA1</i> | Duplication of exon 13  |                       |
| <i>BRCA1</i> | c.3400G>T               | p.Glu1134X            |
| <i>BRCA1</i> | c.3751_3754delGTCT      | p.Cys1252fs           |
| <i>BRCA1</i> | c.5503C>T               | p.Arg1835X            |
| <i>BRCA1</i> | c.797_798del            | p.Val266fs            |
| <i>BRCA1</i> | c.675delT               | p.Ala225fs            |
| <i>BRCA1</i> | Duplication of exon 13  |                       |
| <i>BRCA1</i> | Duplication of exon 13  |                       |
| <i>BRCA1</i> | c.929delA               | p.Gln310fs            |
| <i>BRCA1</i> | c.4065_4068delTCAA      | p.Asn1355fs           |
| <i>BRCA1</i> | c.1756delC              | p.Pro586fs            |
| <i>BRCA1</i> | c.181T>G                | p.Cys61Gly            |
| <i>BRCA1</i> | Duplication of exon 13  |                       |
| <i>BRCA1</i> | Duplication of exon 13  |                       |
| <i>BRCA1</i> | c.3331_3334del          | p.(Gln1111Asnfs*5)    |
| <i>BRCA1</i> | c.929delA               | p.Gln310fs            |
| <i>BRCA1</i> | c.1823_1826delAGAA      | pLys608fs             |
| <i>BRCA1</i> | Duplication of exon 13  |                       |
| <i>BRCA1</i> | c.3751_3754delGTCT      | p.Cys1252fs           |
| <i>BRCA1</i> | c.68-69delAG            | p..Glu23Valfs         |
| <i>BRCA1</i> | Duplication of exon 13  |                       |
| <i>BRCA1</i> | c.427G>T                | p.Glu143X             |
| <i>BRCA1</i> | c.5027T>A               | p.Leu1676X            |
| <i>BRCA1</i> | Duplication of exon 13  |                       |
| <i>BRCA1</i> | Duplication of exon 5-8 |                       |
| <i>BRCA1</i> | c.1823_1826delAGAA      | p.Lys608fs            |
| <i>BRCA1</i> | c.4065_4068delTCAA      | p.Asn135Lysfs         |
| <i>BRCA1</i> | c.5095C>T               | p.Arg1699Trp          |
| <i>BRCA2</i> | c.1813delA              | p.Ile605fs            |
| <i>BRCA2</i> | c.2330dupA              | p.Asp777fs            |
| <i>BRCA2</i> | c.1813delA              | p.Ile605fs            |
| <i>BRCA2</i> | c.5909C>A               | p.Ser1970X            |
| <i>BRCA2</i> | c.7762delA              | p.Ile2588fs           |
| <i>BRCA2</i> | c.4398_4402del          | p.Leu1466Phefs        |
| <i>BRCA2</i> | c.7757G>A               | p.Trp2586X            |
| <i>BRCA2</i> | c.7480C>T               | p.Arg2494X            |
| <i>BRCA2</i> | c.5946delT              | p.Ser1982fs           |
| <i>BRCA2</i> | c.9154C>T               | p.Arg3052Trp          |
| <i>BRCA2</i> | c.7542G>T               | p.Gly2439X            |
| <i>BRCA2</i> | c.8395delA              | p.Arg2799fs           |
| <i>BRCA2</i> | c.517-2A>G              |                       |
| <i>BRCA2</i> | c.5130_5133del          | p.Tyr1710fs-X         |
| <i>BRCA2</i> | c.755_758del            | p.Asp252Valfs         |
| <i>BRCA2</i> | c.517-2A>G              |                       |
| <i>BRCA2</i> | c.7988A>T               | p.Glu2663Val          |
| <i>BRCA2</i> | c.4416_4419del          | p.(Asn1473Lysfs*5)    |
| <i>BRCA2</i> | c.3785C>G               | p.Ser1262X            |
| <i>BRCA2</i> | c.4729G>T               | p.Glu1577X            |
| <i>BRCA2</i> | c.4972C>T               | p.Gln1658X            |

| <b>GENE</b> | <b>Coding change</b>        | <b>Protein change</b> |
|-------------|-----------------------------|-----------------------|
| BRCA2       | c.5682C>G                   | p.Tyr1894X            |
| BRCA2       | c.274C>T                    | p.Gln92X              |
| BRCA2       | c.7654dupA                  | p.Ile2552fs           |
| BRCA2       | c.6275_6276del              | p.Leu2093fs           |
| BRCA2       | c.6405_6409del              | p.(Asn2135Lysfs*3)    |
| BRCA2       | c.8940dupA                  | p.Glu2981Argfs        |
| BRCA2       | c.9382C>T                   | p.Arg3128X            |
| BRCA2       | c.5682C>G                   | p.Tyr1894X            |
| BRCA2       | c.6275_6276del              | p.Leu2093fs           |
| BRCA2       | c.7884dupA                  | p.Trp2629fs           |
| BRCA2       | c.1813dupA                  | p.Ile605fs            |
| BRCA2       | c.4478_4481delAAAG          | p.Glu1493Valfs        |
| BRCA2       | c.4478_4481delAAAG          | p.Glu1493Valfs        |
| BRCA2       | c.3847_3848delGT            | p.Val1283fs           |
| BRCA2       | c.6757_6758del              | p.(Leu2253Phefs*7)    |
| BRCA2       | c.9382C>T                   | p.Arg3128X            |
| BRCA2       | c.5303_5304delTT            | p.Leu1768Argfs        |
| BRCA2       | c.7977-1G>C                 |                       |
| BRCA2       | c.8755-1G>A                 |                       |
| BRCA2       | c.1705_1706del              | p.(Gln569Glufs*20)    |
| BRCA2       | c.9357_9360del              | p.(Ile3120Leufs*42)   |
| BRCA2       | c.439C>T                    | p.Gln147X             |
| BRCA2       | c.9182delT                  | p.Leu3061X            |
| BRCA2       | c.7762delA                  | p.Ile2588fs           |
| BRCA2       | c.6275_6276del              | p.Leu2093fs           |
| BRCA2       | Deletion exon 21            |                       |
| BRCA2       | c.3969_3970insCAAA          | p.Lys1323fs           |
| BRCA2       | c.4478_4481delAAAG          | p.Glu1493Valfs        |
| BRCA2       | c.7737_7749delACAGTTGGCTGAT | p.(Ile2579Metfs*65)   |
| BRCA2       | c.6275_6276del              | p.Leu2093fs           |
| BRCA2       | c.6944_6947del              | p.Ile2315Lysfs        |
| BRCA2       | Deletion exons 14-16        |                       |
| BRCA2       | c.1376T>G                   | p.Leu459X             |
| BRCA2       | c.6275_6276del              | p.Leu2093fs           |
| BRCA2       | Deletion of exon 17         |                       |
| BRCA2       | c.3847_3848delGT            | p.Val1283fs           |
| BRCA2       | c.5577_5580del              | p.(Lys1861*)          |
| BRCA2       | c.1296_1297del              | p.(Asn433Glnfs*18)    |
| BRCA2       | c.1888dupA                  | p.Thr630fs            |
| BRCA2       | c.8813dup                   | p.(Asp2938Glufs*2)    |
| BRCA2       | c.5682C>G                   | p.Tyr1894X            |
| BRCA2       | c.3248delA                  | p.Asn1083fs           |
| BRCA2       | c.5722_5723del              | p.Leu1908fs           |
| BRCA2       | c.4478_4481delAAAG          | p.Glu1493Valfs        |
| BRCA2       | c.8904delC                  | p.Thr2968fs           |
| BRCA2       | c.7757G>A                   | p.Trp2586X            |
| BRCA2       | Deletion of exon 3a         |                       |
| BRCA2       | Deletion of exons 1-11      | 0                     |
| BRCA2       | c.755_758del                | p.Asp252Valfs         |
| BRCA2       | c.5864C>A                   | p.Ser1955X            |
| BRCA2       | c.8904delC                  | p.Thr2968fs           |
| BRCA2       | c.9196C>T                   | p.Gln3066X            |
| BRCA2       | Deletion of exons 1-2       |                       |
| BRCA2       | c.407delA                   | p.Asn136fs            |
| BRCA2       | c.5350_5351delAA            | p.Asn1784Hisfs        |
| BRCA2       | Deletion of exons 14 - 16   |                       |
| BRCA2       | c.6275_6276del              | p.Leu2093fs           |
| BRCA2       | Deletion of exons 14-16     |                       |
| BRCA2       | c.3689delC                  | p.Ser1230fs           |
| BRCA2       | c.9435_9436del              | p.Ser3147Cysfs        |
| BRCA2       | c.7069_7070del              | p.Leu2357Valfs        |
| BRCA2       | c.5722_5723delCT            | p.Leu1908fs           |
| BRCA2       | Deletion of exons 14-16     |                       |
| BRCA2       | c.8878C>T                   | p.Gln2960X            |
| BRCA2       | c.8297delC                  | p.Thr2766fs           |
| BRCA2       | c.1813delA                  | p.Ile605fs            |
| BRCA2       | c.5682C>G                   | p.Tyr1894X            |
| BRCA2       | c.6099delA                  | p.Ile2033fs           |
| BRCA2       | c.6079dupA                  | p.Arg2027fs           |
| BRCA2       | c.8297delC                  | p.Thr2766fs           |
| BRCA2       | c.539_540insAT              | p.Ile180fs            |
| BRCA2       | c.2034_2038delTAATA         | p.Asn678fs            |
| BRCA2       | c.9382C>T                   | p.Arg3128X            |
| BRCA2       | c.2836_2837del              | p.(Asp946Phefs*12)    |
| BRCA2       | c.7069_7070del              | p.Leu2357Valfs        |

| <b>GENE</b> | <b>Coding change</b>   | <b>Protein change</b> |
|-------------|------------------------|-----------------------|
| BRCA2       | c.8904delC             | p.Thr2968fs           |
| BRCA2       | c.370dupA              | p.Met124fs            |
| BRCA2       | c.7007G>A              | p.Arg2336His          |
| BRCA2       | c.2808_2811del         | p.(Ala938Profs*21)    |
| BRCA2       | c.5350_5353del         | p.Asn1784Hisfs        |
| BRCA2       | c.6275_6276del         | p.Leu2093fs           |
| BRCA2       | c.5682C>G              | p.Tyr1894X            |
| BRCA2       | c.5946delT             | p.Ser1982fs           |
| BRCA2       | c.9945delA             | p.Lys3315fs           |
| BRCA2       | c.6275_6276del         | p.Leu2093fs           |
| BRCA2       | Deletion of exons 8-10 |                       |
| BRCA2       | c.7480C>T              | p.Arg2494X            |
| BRCA2       | c.8167G>C              | p.Asp2723His          |
| BRCA2       | c.7934delG             | p.Arg2645fs           |
| BRCA2       | c.6816_6820del         | p.Gly2274fs           |
| BRCA2       | c.1189_1190insTTAG     | p.Gln397fs            |
| BRCA2       | c.755_758del           | p.Asp252Valfs         |
| BRCA2       | c.9117G>A              | p.Pro3039Pro          |
| BRCA2       | c.5946delT             | p.Ser1982fs           |
| BRCA2       | c.755_758del           | p.Asp252Valfs         |
| BRCA2       | c.9972A>T              | p.Lys3326X            |
| BRCA2       | c.3405C>A              | p.Tyr1135X            |
| BRCA2       | c.4478_4481delAAAG     | p.Glu1493Valfs        |
| BRCA2       | c.574_575del           | p.(Met192Valfs*13)    |
| BRCA2       | c.6275_6276del         | p.Leu2093fs           |
| BRCA2       | c.5645C>A              | p.Ser1882X            |
| BRCA2       | c.3785C>G              | p.Ser1262X            |
| BRCA2       | c.9196C>T              | p.Gln3066X            |
| BRCA2       | c.6643delT             | p.Tyr2215fs           |
| BRCA2       | c.755_758del           | p.Asp252Valfs         |
| BRCA2       | c.6275_6276del         | p.Leu2093fs           |
| BRCA2       | c.4169delT             | p.Leu1390fs           |
| BRCA2       | c.9382C>T              | p.Arg3128X            |
| BRCA2       | c.5350_5351delAA       | p.Asn1784Hisfs        |
| BRCA2       | c.396T>A               | p.Cys132X             |
| BRCA2       | c.1389_1390del         | p.463_464del          |
| BRCA2       | c.5350_5351delAA       | p.Asn1784Hisfs        |
| BRCA2       | c.5682C>G              | p.Tyr1894X            |
| BRCA2       | c.6333_6337del         | p.(Arg2112Profs*15)   |
| BRCA2       | c.1459delA             | p.Ile411Tyrfs         |



**Appendix Table 3: Cause of death breakdown by BRCA status (analysis population who died)**

List of all causes of death in the reported cohort.

| Characteristic                             | All patients<br>(n=678) | BRCA1+<br>(n=47)  | BRCA2+<br>(n=37)  | BRCA+<br>(n=84)   | BRCA-<br>(n=594)   |
|--------------------------------------------|-------------------------|-------------------|-------------------|-------------------|--------------------|
| Cause of death                             |                         |                   |                   |                   |                    |
| <b>Breast Cancer</b>                       | <b>651 (96.0%)</b>      | <b>41 (87.2%)</b> | <b>36 (97.3%)</b> | <b>77 (91.7%)</b> | <b>574 (96.6%)</b> |
| <b>Other Cancer</b>                        | <b>18 (2.7%)</b>        | <b>6 (12.8%)</b>  | <b>0 (0%)</b>     | <b>6 (7.1%)</b>   | <b>12 (2%)</b>     |
| Brain                                      | 1 (0.1%)                | 0 (0%)            | 0 (0%)            | 0 (0%)            | 1 (0.2%)           |
| Colorectal                                 | 1 (0.1%)                | 0 (0%)            | 0 (0%)            | 0 (0%)            | 1 (0.2%)           |
| Gastric                                    | 1 (0.1%)                | 0 (0%)            | 0 (0%)            | 0 (0%)            | 1 (0.2%)           |
| Haematological                             | 4 (0.6%)                | 0 (0%)            | 0 (0%)            | 0 (0%)            | 4 (0.7%)           |
| Lung                                       | 3 (0.4%)                | 0 (0%)            | 0 (0%)            | 0 (0%)            | 3 (0.5%)           |
| Oesophageal                                | 1 (0.1%)                | 1 (2.1%)          | 0 (0%)            | 1 (1.2%)          | 0 (0%)             |
| Ovarian                                    | 3 (0.4%)                | 3 (6.4%)          | 0 (0%)            | 3 (3.6%)          | 0 (0%)             |
| Pancreas                                   | 1 (0.1%)                | 1 (2.1%)          | 0 (0%)            | 1 (1.2%)          | 0 (0%)             |
| Pancreatic                                 | 1 (0.1%)                | 0 (0%)            | 0 (0%)            | 0 (0%)            | 1 (0.2%)           |
| Peritoneal                                 | 1 (0.1%)                | 1 (2.1%)          | 0 (0%)            | 1 (1.2%)          | 0 (0%)             |
| Sarcoma                                    | 1 (0.1%)                | 0 (0%)            | 0 (0%)            | 0 (0%)            | 1 (0.2%)           |
| <b>Other</b>                               | <b>8 (1.2%)</b>         | <b>0 (0%)</b>     | <b>1 (2.7%)</b>   | <b>1 (1.2%)</b>   | <b>7 (1.2%)</b>    |
| Accident                                   | 1 (0.1%)                | 0 (0%)            | 0 (0%)            | 0 (0%)            | 1 (0.2%)           |
| Adrenal insufficiency                      | 1 (0.1%)                | 0 (0%)            | 0 (0%)            | 0 (0%)            | 1 (0.2%)           |
| Alcohol                                    | 2 (0.3%)                | 0 (0%)            | 0 (0%)            | 0 (0%)            | 2 (0.3%)           |
| Alcohol, adrenal failure                   | 1 (0.1%)                | 0 (0%)            | 0 (0%)            | 0 (0%)            | 1 (0.2%)           |
| Cardiac                                    | 1 (0.1%)                | 0 (0%)            | 0 (0%)            | 0 (0%)            | 1 (0.2%)           |
| Cerebral complication from Crohn's disease | 1 (0.1%)                | 0 (0%)            | 0 (0%)            | 0 (0%)            | 1 (0.2%)           |
| Infection                                  | 1 (0.1%)                | 0 (0%)            | 1 (2.7%)          | 1 (1.2%)          | 0 (0%)             |
| <b>Unknown</b>                             | <b>1 (0.1%)</b>         | <b>0 (0%)</b>     | <b>0 (0%)</b>     | <b>0 (0%)</b>     | <b>1 (0.2%)</b>    |
| Died abroad                                | 1 (0.1%)                | 0 (0%)            | 0 (0%)            | 0 (0%)            | 1 (0.2%)           |

**Appendix Table 4: Multivariable Analyses - Complete-Case Results (analysis population)**

Breakdown of complete-case results for each multivariable analysis carried out on the analysis population.

| Characteristic           | OS by BRCA |                            | DDFS by BRCA |                            | OS by BRCA1 |                            | OS by BRCA2 |                            | OS by BRCA (adjusted for time to blood draw) |                            |
|--------------------------|------------|----------------------------|--------------|----------------------------|-------------|----------------------------|-------------|----------------------------|----------------------------------------------|----------------------------|
|                          | # (events) | HR (95% CI), p-value}      | # (events)   | HR (95% CI), p-value}      | # (events)  | HR (95% CI), p-value}      | # (events)  | HR (95% CI), p-value}      | # (events)                                   | HR (95% CI), p-value}      |
| BRCA- (Ref.)             | 2395 (594) | 1.00 (Ref.)                | 2395 (659)   | 1.00 (Ref.)                | 2395 (594)  | 1.00 (Ref.)                | 2395 (594)  | 1.00 (Ref.)                | 2395 (594)                                   | 1.00 (Ref.)                |
| UVA BRCA*+               | 338 (84)   | 0.99 (0.78, 1.24), 0.90    | 338 (93)     | 0.99 (0.80, 1.23), 0.94    | 201 (47)    | 0.93 (0.69, 1.25), 0.64    | 137 (37)    | 1.07 (0.76, 1.49), 0.71    | 338 (84)                                     | 1.01 (0.81, 1.27), 0.91    |
| MVA BRCA*+               | 338 (84)   | 0.87 (0.66, 1.13), 0.29    | 338 (93)     | 0.91 (0.70, 1.17), 0.45    | 201 (47)    | 0.86 (0.61, 1.20), 0.37    | 137 (37)    | 0.86 (0.58, 1.29), 0.47    | 338 (84)                                     | 0.89 (0.68, 1.17), 0.41    |
| Age at diagnosis         | 2733 (678) | 0.97 (0.95, 1.00), 0.019   | 2733 (752)   | 0.97 (0.95, 0.99), 0.014   | 2596 (641)  | 0.97 (0.95, 1.00), 0.027   | 2532 (631)  | 0.97 (0.95, 1.00), 0.024   | 2733 (678)                                   | 0.97 (0.95, 1.00), 0.018   |
| BMI<25 (Ref.)            | 1427 (313) | 1.00 (Ref.)                | 1427 (359)   | 1.00 (Ref.)                | 1357 (298)  | 1.00 (Ref.)                | 1313 (294)  | 1.00 (Ref.)                | 1427 (313)                                   | 1.00 (Ref.)                |
| 25{&le}BMI<30            | 714 (197)  | 1.24 (1.02, 1.50), 0.032   | 714 (211)    | 1.17 (0.97, 1.41), 0.10    | 673 (183)   | 1.20 (0.98, 1.47), 0.077   | 667 (181)   | 1.18 (0.97, 1.45), 0.11    | 714 (197)                                    | 1.24 (1.02, 1.51), 0.028   |
| BMI{&ge}30               | 491 (152)  | 1.28 (1.03, 1.60), 0.026   | 491 (166)    | 1.26 (1.02, 1.55), 0.031   | 469 (145)   | 1.26 (1.00, 1.57), 0.046   | 460 (142)   | 1.20 (0.96, 1.52), 0.11    | 491 (152)                                    | 1.28 (1.03, 1.60), 0.026   |
| Grade 1 (Ref.)           | 156 (11)   | 1.00 (Ref.)                | 156 (18)     | 1.00 (Ref.)                | 156 (11)    | 1.00 (Ref.)                | 154 (10)    | 1.00 (Ref.)                | 156 (11)                                     | 1.00 (Ref.)                |
| Grade 2                  | 904 (200)  | 2.56 (1.05, 6.25), 0.040   | 904 (231)    | 1.67 (0.85, 3.28), 0.13    | 864 (185)   | 2.47 (1.01, 6.03), 0.048   | 888 (197)   | 2.54 (1.04, 6.21), 0.041   | 904 (200)                                    | 2.58 (1.06, 6.30), 0.038   |
| Grade 3                  | 1598 (450) | 3.63 (1.49, 8.83), 0.0045  | 1598 (482)   | 2.25 (1.15, 4.39), 0.018   | 1509 (431)  | 3.65 (1.50, 8.90), 0.0043  | 1419 (408)  | 3.57 (1.47, 8.70), 0.0051  | 1598 (450)                                   | 3.63 (1.49, 8.83), 0.0045  |
| Max. inv. size (cm)      | 2577 (638) | 1.10 (1.06, 1.14), <0.0001 | 2577 (710)   | 1.11 (1.07, 1.15), <0.0001 | 2454 (607)  | 1.10 (1.06, 1.14), <0.0001 | 2386 (594)  | 1.10 (1.06, 1.14), <0.0001 | 2577 (638)                                   | 1.10 (1.06, 1.14), <0.0001 |
| HER2- (Ref.)             | 1763 (442) | 1.00 (Ref.)                | 1763 (484)   | 1.00 (Ref.)                | 1652 (414)  | 1.00 (Ref.)                | 1599 (400)  | 1.00 (Ref.)                | 1763 (442)                                   | 1.00 (Ref.)                |
| HER2+                    | 649 (193)  | 0.97 (0.80, 1.17), 0.74    | 649 (218)    | 1.07 (0.89, 1.28), 0.48    | 635 (185)   | 0.94 (0.78, 1.14), 0.56    | 637 (191)   | 0.97 (0.80, 1.18), 0.76    | 649 (193)                                    | 0.98 (0.81, 1.18), 0.81    |
| N0 stage (Ref.)          | 1304 (189) | 1.00 (Ref.)                | 1304 (212)   | 1.00 (Ref.)                | 1249 (179)  | 1.00 (Ref.)                | 1175 (166)  | 1.00 (Ref.)                | 1304 (189)                                   | 1.00 (Ref.)                |
| N1 stage                 | 1388 (479) | 2.26 (1.84, 2.78), <0.0001 | 1388 (530)   | 2.30 (1.90, 2.80), <0.0001 | 1308 (452)  | 2.30 (1.86, 2.83), <0.0001 | 1316 (455)  | 2.27 (1.83, 2.81), <0.0001 | 1388 (479)                                   | 2.28 (1.86, 2.80), <0.0001 |
| ER- (Ref.)               | 908 (248)  | 1.00 (Ref.)                | 908 (260)    | 1.00 (Ref.)                | 887 (245)   | 1.00 (Ref.)                | 757 (212)   | 1.00 (Ref.)                | 908 (248)                                    | 1.00 (Ref.)                |
| ER+ (2 years)            | 1811 (428) | 0.34 (0.25, 0.45), <0.0001 | 1811 (490)   | 0.63 (0.52, 0.78), <0.0001 | 1696 (394)  | 0.34 (0.25, 0.45), <0.0001 | 1762 (417)  | 0.32 (0.23, 0.43), <0.0001 | 1811 (428)                                   | 0.34 (0.25, 0.45), <0.0001 |
| ER+ (5 years)            | 1811 (428) | 1.27 (0.97, 1.67), 0.082   | 1811 (490)   | 1.61 (1.23, 2.10), 0.00048 | 1696 (394)  | 1.20 (0.93, 1.55), 0.17    | 1762 (417)  | 1.21 (0.92, 1.59), 0.17    | 1811 (428)                                   | 1.28 (0.97, 1.69), 0.076   |
| ER+ (10 years)           | 1811 (428) | 2.17 (1.50, 3.13), <0.0001 | 1811 (490)   | 3.46 (2.01, 5.95), <0.0001 | 1696 (394)  | 2.22 (1.52, 3.27), <0.0001 | 1762 (417)  | 2.39 (1.58, 3.61), <0.0001 | 1811 (428)                                   | 2.15 (1.49, 3.10), <0.0001 |
| White ethnicity (Ref.)   | 2494 (610) | 1.00 (Ref.)                | 2494 (672)   | 1.00 (Ref.)                | 2372 (577)  | 1.00 (Ref.)                | 2316 (566)  | 1.00 (Ref.)                | 2494 (610)                                   | 1.00 (Ref.)                |
| Black ethnicity          | 103 (38)   | 1.36 (0.94, 1.98), 0.10    | 103 (44)     | 1.54 (1.09, 2.18), 0.014   | 97 (36)     | 1.41 (0.97, 2.06), 0.075   | 93 (36)     | 1.45 (1.00, 2.12), 0.053   | 103 (38)                                     | 1.36 (0.94, 1.97), 0.10    |
| Asian ethnicity          | 80 (20)    | 1.01 (0.59, 1.72), 0.98    | 80 (24)      | 1.13 (0.70, 1.84), 0.61    | 76 (20)     | 1.03 (0.60, 1.76), 0.91    | 75 (19)     | 1.00 (0.57, 1.74), 01      | 80 (20)                                      | 0.99 (0.58, 1.69), 0.97    |
| Other ethnicity          | 21 (3)     | 0.96 (0.31, 3.01), 0.95    | 21 (5)       | 1.18 (0.44, 3.17), 0.74    | 19 (2)      | 0.69 (0.17, 2.78), 0.60    | 18 (3)      | 1.01 (0.32, 3.17), 0.98    | 21 (3)                                       | 0.99 (0.32, 3.10), 0.99    |
| No use of taxanes (Ref.) | 1780 (455) | 1.00 (Ref.)                | 1780 (507)   | 1.00 (Ref.)                | 1689 (436)  | 1.00 (Ref.)                | 1633 (422)  | 1.00 (Ref.)                | 1780 (455)                                   | 1.00 (Ref.)                |
| Use of taxanes           | 659 (190)  | 1.02 (0.84, 1.23), 0.84    | 659 (205)    | 0.95 (0.79, 1.14), 0.56    | 624 (175)   | 1.00 (0.83, 1.22), 0.97    | 614 (177)   | 1.01 (0.83, 1.23), 0.94    | 659 (190)                                    | 1.01 (0.83, 1.22), 0.95    |

**Appendix Table 5: Multivariable Analyses - Complete-Case Results (TNBC population)**

Breakdown of complete-case results for each multivariable analysis carried out on the TNBC population.

| Characteristic           | OS by BRCA |                            | DDFS by BRCA |                            | OS by BRCA (excluding bilateral mastectomies) |                            | OS by BRCA (excluding new primary or ovarian cancers) |                            |
|--------------------------|------------|----------------------------|--------------|----------------------------|-----------------------------------------------|----------------------------|-------------------------------------------------------|----------------------------|
|                          | # (events) | HR (95% CI), p-value       | # (events)   | HR (95% CI), p-value       | # (events)                                    | HR (95% CI), p-value       | # (events)                                            | HR (95% CI), p-value       |
| BRCA- (Ref.)             | 422 (120)  | 1.00 (Ref.)                | 422 (122)    | 1.00 (Ref.)                | 412 (119)                                     | 1.00 (Ref.)                | 407 (114)                                             | 1.00 (Ref.)                |
| UVA BRCA+ (at 2 years)   | 136 (33)   | 0.59 (0.35, 0.99), 0.044   | 136 (37)     | 0.82 (0.55, 1.20), 0.31    | 115 (27)                                      | 0.55 (0.32, 0.97), 0.039   | 114 (23)                                              | 0.60 (0.34, 1.05), 0.071   |
| UVA BRCA+ (at 5 years)   | 136 (33)   | 1.09 (0.67, 1.75), 0.75    | 136 (37)     | 1.46 (0.81, 2.64), 0.20    | 115 (27)                                      | 1.00 (0.60, 1.68), 0.99    | 114 (23)                                              | 0.80 (0.44, 1.43), 0.46    |
| UVA BRCA+ (at 10 years)  | 136 (33)   | 1.96 (0.76, 5.05), 0.17    | 136 (37)     | 2.41 (0.83, 7.05), 0.11    | 115 (27)                                      | 1.72 (0.64, 4.63), 0.29    | 114 (23)                                              | 1.08 (0.34, 3.46), 0.90    |
| MVA BRCA+ (at 2 years)   | 136 (33)   | 0.51 (0.29, 0.90), 0.019   | 136 (37)     | 0.94 (0.50, 1.75), 0.85    | 115 (27)                                      | 0.43 (0.22, 0.80), 0.0084  | 114 (23)                                              | 0.52 (0.28, 0.96), 0.037   |
| MVA BRCA+ (at 5 years)   | 136 (33)   | 1.08 (0.65, 1.79), 0.79    | 136 (37)     | 1.27 (0.69, 2.35), 0.46    | 115 (27)                                      | 0.90 (0.52, 1.57), 0.73    | 114 (23)                                              | 0.87 (0.47, 1.60), 0.67    |
| MVA BRCA+ (at 10 years)  | 136 (33)   | 2.10 (0.80, 5.54), 0.13    | 136 (37)     | 3.60 (0.89, 14.49), 0.071  | 115 (27)                                      | 1.72 (0.62, 4.81), 0.30    | 114 (23)                                              | 1.36 (0.44, 4.19), 0.60    |
| Age at diagnosis         | 558 (153)  | 1.02 (0.97, 1.08), 0.36    | 558 (159)    | 1.02 (0.97, 1.07), 0.48    | 517 (143)                                     | 1.03 (0.98, 1.09), 0.22    | 521 (137)                                             | 1.04 (0.99, 1.10), 0.16    |
| BMI<25 (Ref.)            | 274 (63)   | 1.00 (Ref.)                | 274 (68)     | 1.00 (Ref.)                | 257 (60)                                      | 1.00 (Ref.)                | 257 (57)                                              | 1.00 (Ref.)                |
| 25 ≤ BMI < 30            | 149 (54)   | 1.51 (1.02, 2.23), 0.038   | 149 (55)     | 1.41 (0.97, 2.06), 0.074   | 141 (50)                                      | 1.48 (0.99, 2.20), 0.055   | 139 (50)                                              | 1.59 (1.06, 2.37), 0.025   |
| BMI ≥ 30                 | 123 (33)   | 1.11 (0.71, 1.74), 0.63    | 123 (33)     | 0.97 (0.62, 1.50), 0.88    | 119 (33)                                      | 1.10 (0.70, 1.72), 0.68    | 113 (27)                                              | 1.07 (0.66, 1.72), 0.79    |
| Max. inv. size (cm)      | 523 (143)  | 1.11 (1.04, 1.19), 0.0012  | 523 (149)    | 1.12 (1.05, 1.20), 0.0010  | 495 (137)                                     | 1.11 (1.04, 1.19), 0.0012  | 491 (130)                                             | 1.11 (1.04, 1.19), 0.0014  |
| N0 stage (Ref.)          | 341 (58)   | 1.00 (Ref.)                | 341 (61)     | 1.00 (Ref.)                | 322 (55)                                      | 1.00 (Ref.)                | 322 (51)                                              | 1.00 (Ref.)                |
| N1 stage                 | 211 (94)   | 2.72 (1.88, 3.94), <0.0001 | 211 (97)     | 2.61 (1.82, 3.75), <0.0001 | 200 (90)                                      | 2.82 (1.93, 4.12), <0.0001 | 194 (86)                                              | 2.98 (2.01, 4.41), <0.0001 |
| White ethnicity (Ref.)   | 500 (140)  | 1.00 (Ref.)                | 500 (145)    | 1.00 (Ref.)                | 474 (133)                                     | 1.00 (Ref.)                | 470 (128)                                             | 1.00 (Ref.)                |
| Black ethnicity          | 26 (10)    | 2.12 (1.02, 4.39), 0.044   | 26 (11)      | 2.00 (1.00, 3.97), 0.049   | 24 (10)                                       | 2.52 (1.21, 5.24), 0.014   | 21 (6)                                                | 1.89 (0.82, 4.38), 0.13    |
| Asian ethnicity          | 19 (1)     | 0.33 (0.05, 2.36), 0.27    | 19 (1)       | 0.28 (0.04, 2.04), 0.21    | 18 (1)                                        | 0.34 (0.05, 2.46), 0.29    | 18 (1)                                                | 0.35 (0.05, 2.49), 0.29    |
| Other ethnicity          | 5 (1)      | 0.68 (0.09, 4.90), 0.70    | 5 (1)        | 0.96 (0.13, 6.97), 0.97    | 3 (1)                                         | 0.76 (0.10, 5.53), 0.79    | 5 (1)                                                 | 0.70 (0.10, 5.08), 0.72    |
| No use of taxanes (Ref.) | 384 (98)   | 1.00 (Ref.)                | 384 (102)    | 1.00 (Ref.)                | 361 (94)                                      | 1.00 (Ref.)                | 357 (88)                                              | 1.00 (Ref.)                |
| Use of taxanes           | 161 (55)   | 1.17 (0.81, 1.68), 0.41    | 161 (57)     | 1.19 (0.84, 1.71), 0.33    | 154 (52)                                      | 1.12 (0.77, 1.64), 0.55    | 152 (49)                                              | 1.12 (0.76, 1.64), 0.57    |

## Appendix - Figures

### Appendix Figure 1 – Flow diagram of the POSH cohort

Flow diagram of the POSH cohort.

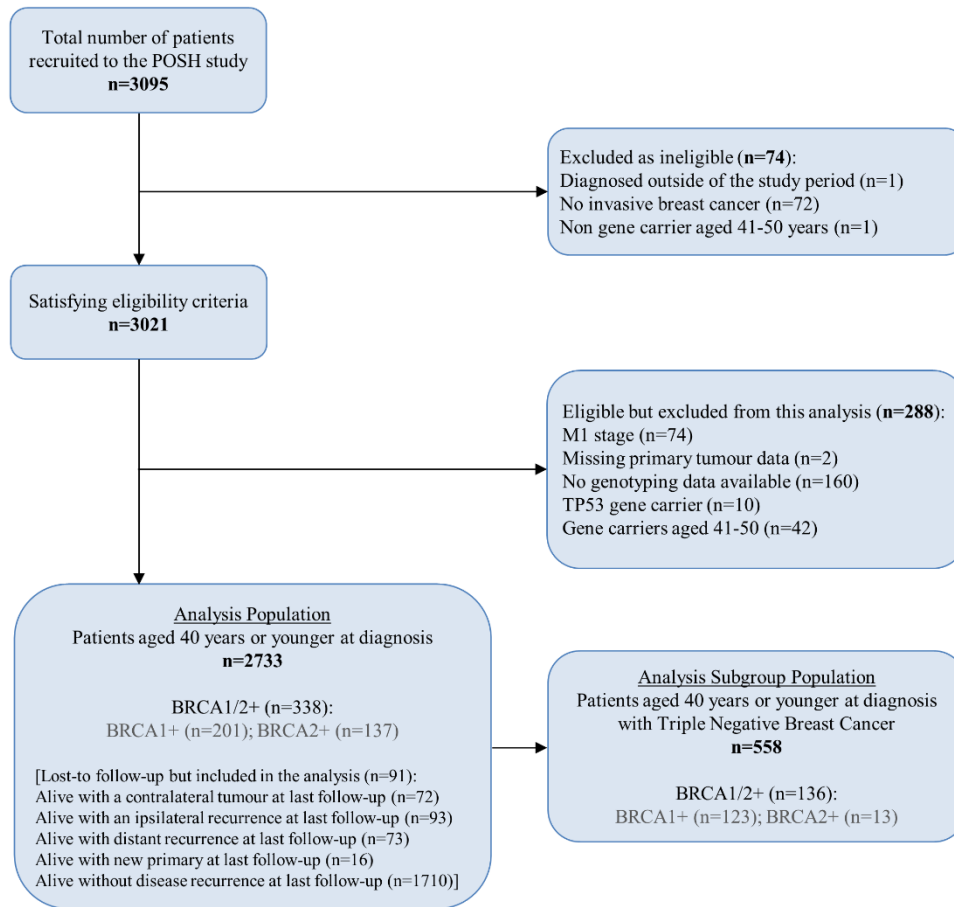

**Appendix Figure 2 – Distant Disease Free Survival by BRCA status for all patients (analysis population)**

Kaplan-Meier plot by BRCA1 and/or 2 status (BRCA+/-) for Distant Disease Free Survival (OS) (Panel A); and Forest Plot of corresponding univariable and multivariable hazard ratios by BRCA+/- status for Distant Disease Free (Panel B). In Panel B, multivariable analysis is adjusted for age, body mass index, grade, tumour size, HER2 status, ER status, ethnicity and use of taxane chemotherapy.

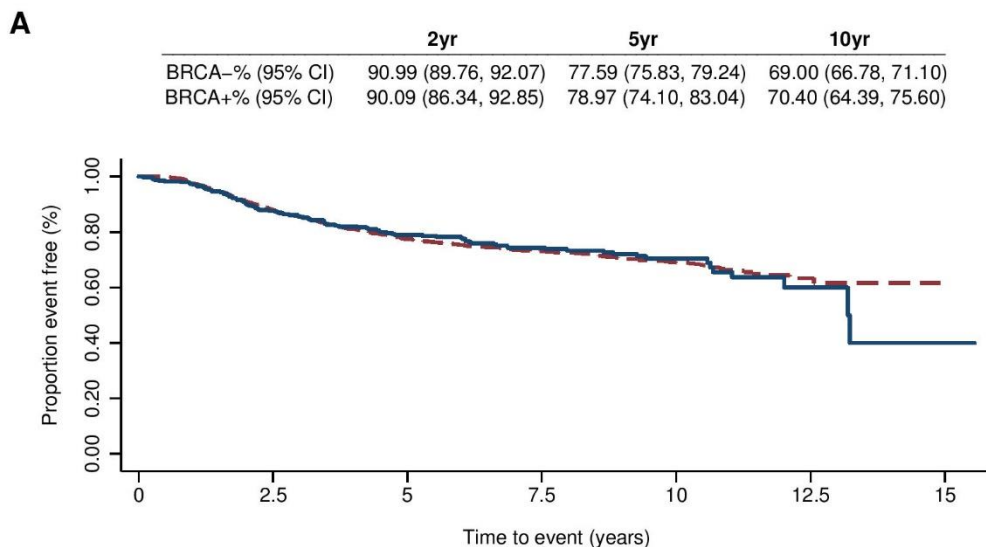

Number at risk (censored)

|       |            |            |           |           |          |        |   |
|-------|------------|------------|-----------|-----------|----------|--------|---|
| BRCA- | 2395 (285) | 2057 (234) | 1628 (82) | 1050 (41) | 408 (16) | 40 (1) | 0 |
| BRCA+ | 338 (41)   | 285 (27)   | 230 (12)  | 156 (6)   | 66 (5)   | 9 (2)  | 2 |

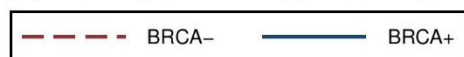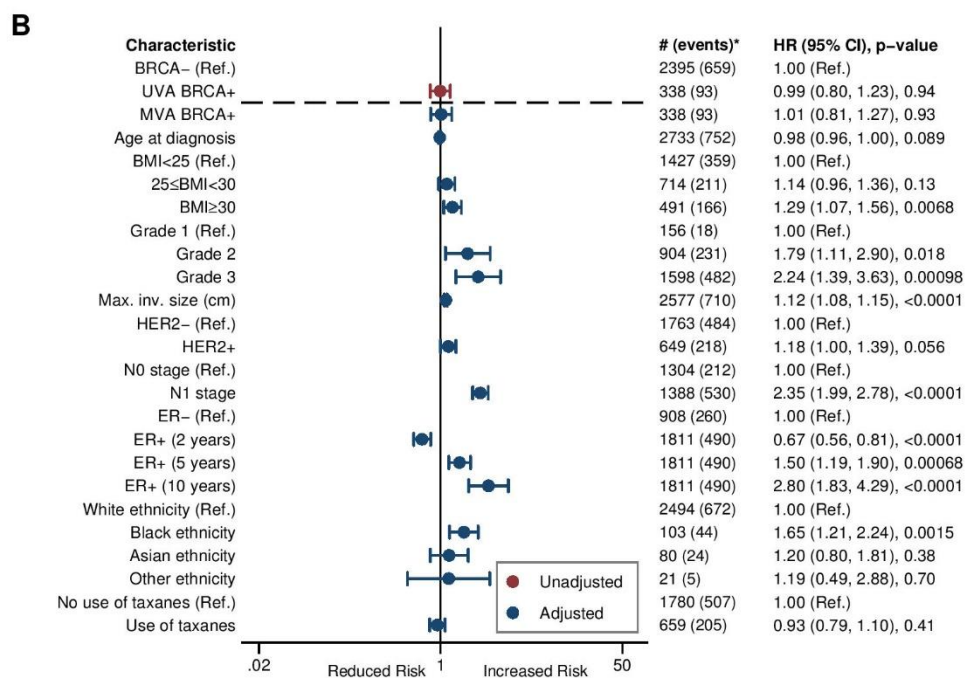

\*Number of patients (events experienced) from complete data prior to multiple imputation

**Appendix Figure 3 – Overall Survival by BRCA1 status for all patients (analysis population)**

Kaplan-Meier plot by BRCA1 status (BRCA1+/-) for Overall Survival (OS) (Panel A); and Forest Plot of corresponding univariable and multivariable hazard ratios by BRCA1+/- status for Overall Survival (Panel B). In Panel B, multivariable analysis is adjusted for age, body mass index, grade, tumour size, HER2 status, ER status, ethnicity and use of taxane chemotherapy.

**A**

|                 | 2yr                  | 5yr                  | 10yr                 |
|-----------------|----------------------|----------------------|----------------------|
| BRCA1- (95% CI) | 96.63 (95.82, 97.28) | 85.05 (83.52, 86.44) | 70.07 (67.70, 72.30) |
| BRCA1+ (95% CI) | 95.93 (92.03, 97.95) | 84.61 (78.60, 89.05) | 73.73 (65.49, 80.30) |

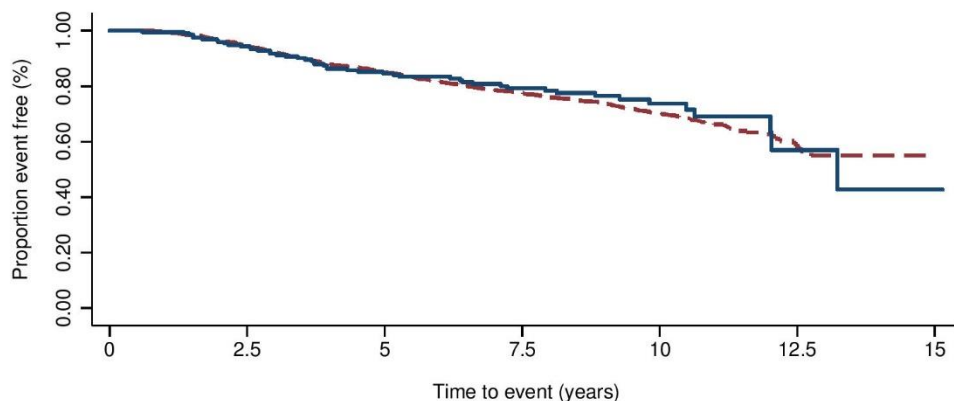

Number at risk (censored)

|        | 0          | 2.5        | 5          | 7.5       | 10       | 12.5   | 15 |
|--------|------------|------------|------------|-----------|----------|--------|----|
| BRCA1- | 2395 (125) | 2217 (217) | 1805 (141) | 1160 (78) | 452 (30) | 48 (3) | 0  |
| BRCA1+ | 201 (11)   | 181 (18)   | 146 (8)    | 99 (5)    | 45 (4)   | 5 (1)  | 1  |

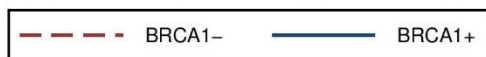

**B**

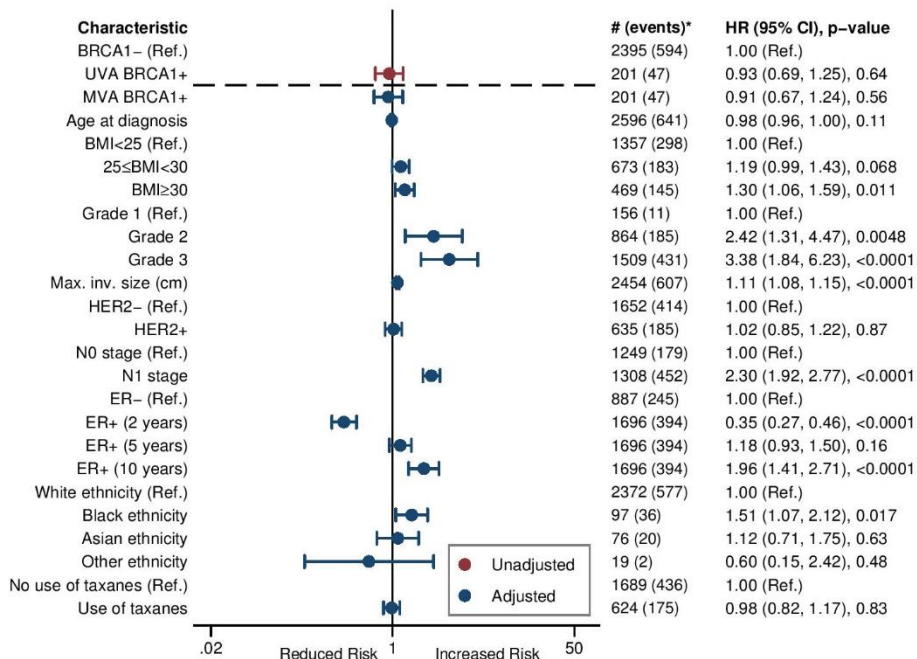

\*Number of patients (events experienced) from complete data prior to multiple imputation

**Appendix Figure 4 – Overall Survival by BRCA2 status for all patients (analysis population)**

Kaplan-Meier plot by BRCA2 status (BRCA2+/-) for Overall Survival (OS) (Panel A); and Forest Plot of corresponding univariable and multivariable hazard ratios by BRCA2+/- status for Overall Survival (Panel B). In Panel B, multivariable analysis is adjusted for age, body mass index, grade, tumour size, HER2 status, ER status, ethnicity and use of taxane chemotherapy.

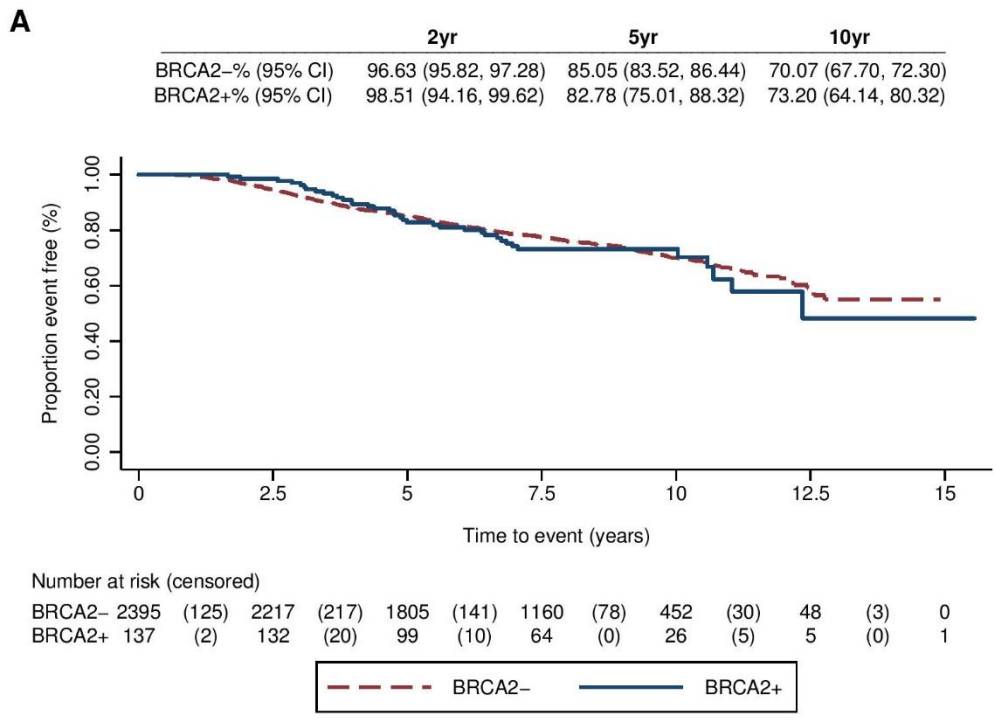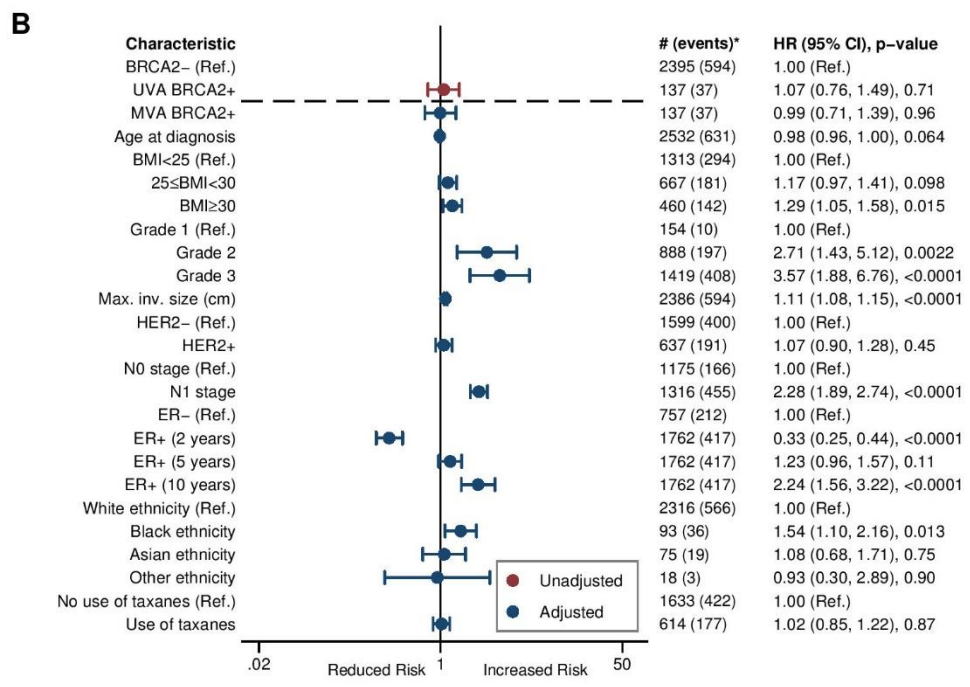

\*Number of patients (events experienced) from complete data prior to multiple imputation

**Appendix Figure 5 – Distant Disease Free Survival by BRCA status for all TNBC patients (TNBC population)**

Kaplan-Meier plot by BRCA1 and/or 2 status (BRCA+/-) for Distant Disease Free Survival (OS) (Panel A); and Forest Plot of corresponding univariable and multivariable hazard ratios by BRCA+/- status for Distant Disease Free Survival (Panel B). In Panel B, multivariable analysis is adjusted for age, body mass index, tumour size, ethnicity and use of taxane chemotherapy.

**A**

|                 | 2yr                  | 5yr                  | 10yr                 |
|-----------------|----------------------|----------------------|----------------------|
| BRCA-% (95% CI) | 82.52 (78.52, 85.84) | 72.05 (67.43, 76.14) | 69.76 (64.74, 74.21) |
| BRCA+% (95% CI) | 85.89 (78.77, 90.76) | 77.02 (68.77, 83.36) | 71.15 (62.16, 78.38) |

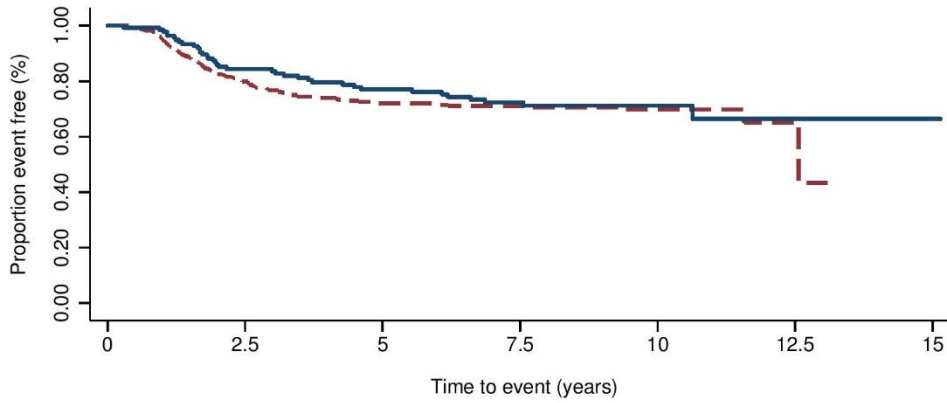

Number at risk (censored)

|       | 0        | 2.5      | 5       | 7.5     | 10     | 12.5  | 15 |
|-------|----------|----------|---------|---------|--------|-------|----|
| BRCA- | 422 (84) | 329 (31) | 257 (3) | 160 (2) | 61 (1) | 4 (1) | 0  |
| BRCA+ | 136 (21) | 109 (9)  | 89 (5)  | 61 (1)  | 26 (1) | 2 (0) | 1  |

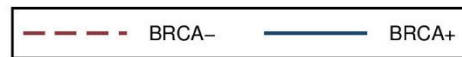

**B**

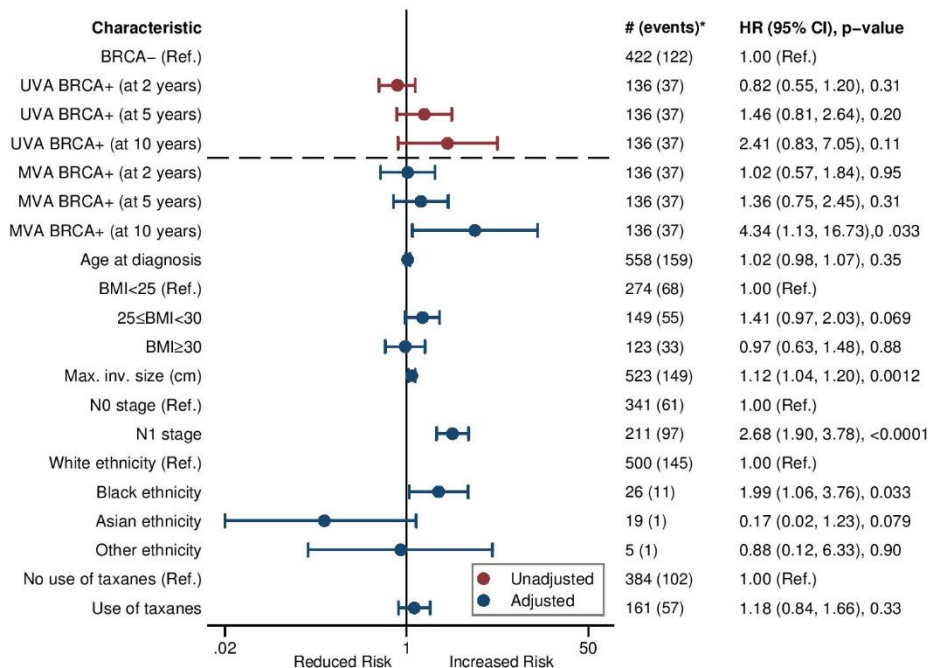

\*Number of patients (events experienced) from complete data prior to multiple imputation



**Appendix Figure 6 – Overall Survival by BRCA status for all patients, adjusting for time to blood draw (analysis population)**

Forest Plot of univariable and multivariable hazard ratios by BRCA+/- status for Overall Survival (OS), adjusting for time to blood draw. Multivariable analysis is also adjusted for age, body mass index, grade, tumour size, HER2 status, ER status, ethnicity and use of taxane chemotherapy.

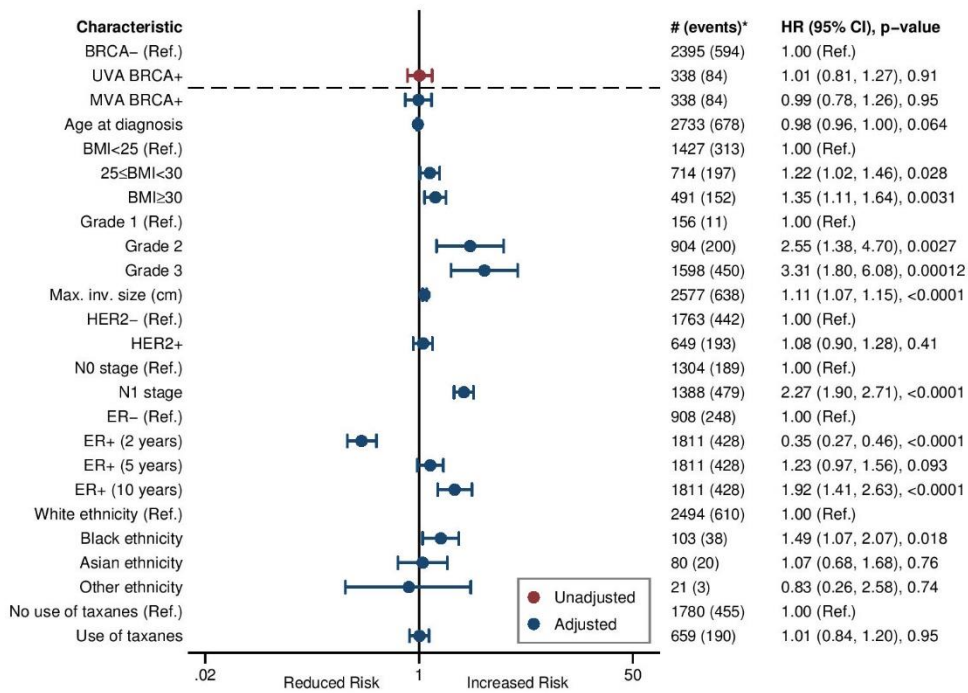

\*Number of patients (events experienced) from complete data prior to multiple imputation

### Appendix Figure 7 – Multivariable Analyses - Proportional hazards tests

Proportional hazards (PH) test results for the main comparators for: (A) Overall Survival (OS) by BRCA status – analysis population (PH assumption met); (B) Distant disease free survival (DDFS) by BRCA status – analysis population (PH assumption met); (C) OS by BRCA1 status – analysis population (PH assumption met); (D) OS by BRCA2 status – analysis population (PH assumption met); (E) OS by BRCA status – TNBC population (PH assumption not met); (F) DDFS by BRCA status – TNBC population (PH assumption not met); (G) OS by BRCA status, adjusted for time to blood draw – analysis population (PH assumption met); (H) OS by BRCA status - TNBC population, excluding patients not having immediate bilateral mastectomies (PH assumption not met); (I) OS by BRCA status - TNBC population, excluding patients who developed a new primary breast or ovarian cancer (PH assumption not met).

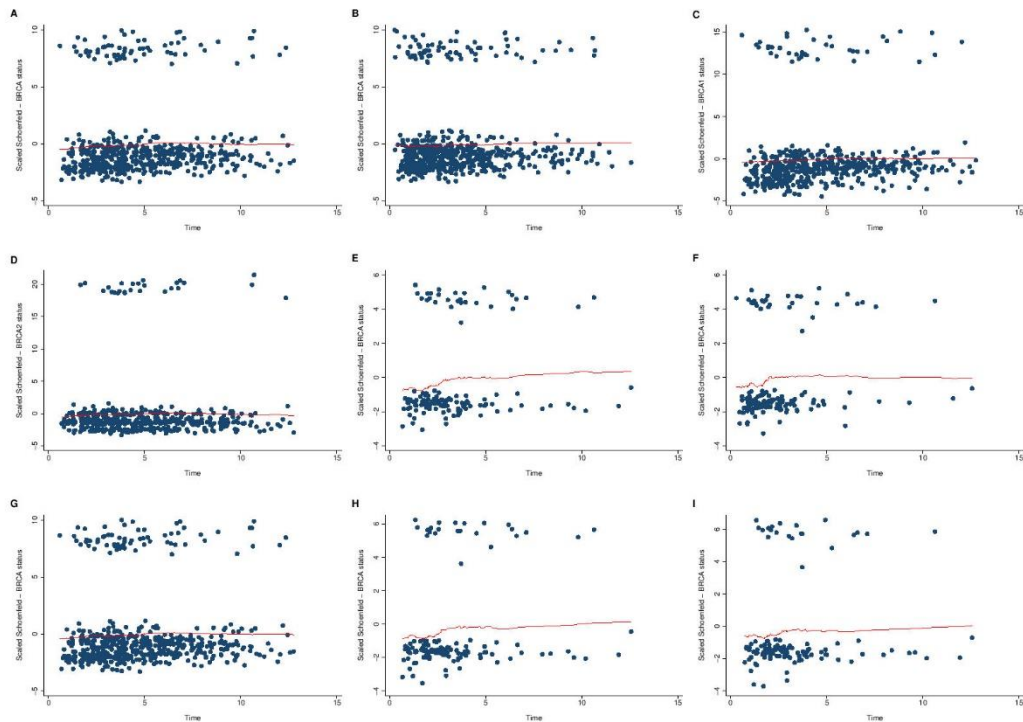

**Appendix Figure 8 – Overall Survival by BRCA status for TNBC patients not having immediate bilateral mastectomies (TNBC population, excluding patients not having immediate bilateral mastectomies)**

Forest Plot of univariable and multivariable hazard ratios by BRCA+/- status for Overall Survival (OS). Multivariable analysis is adjusted for age, body mass index, tumour size, ethnicity and use of taxane chemotherapy.

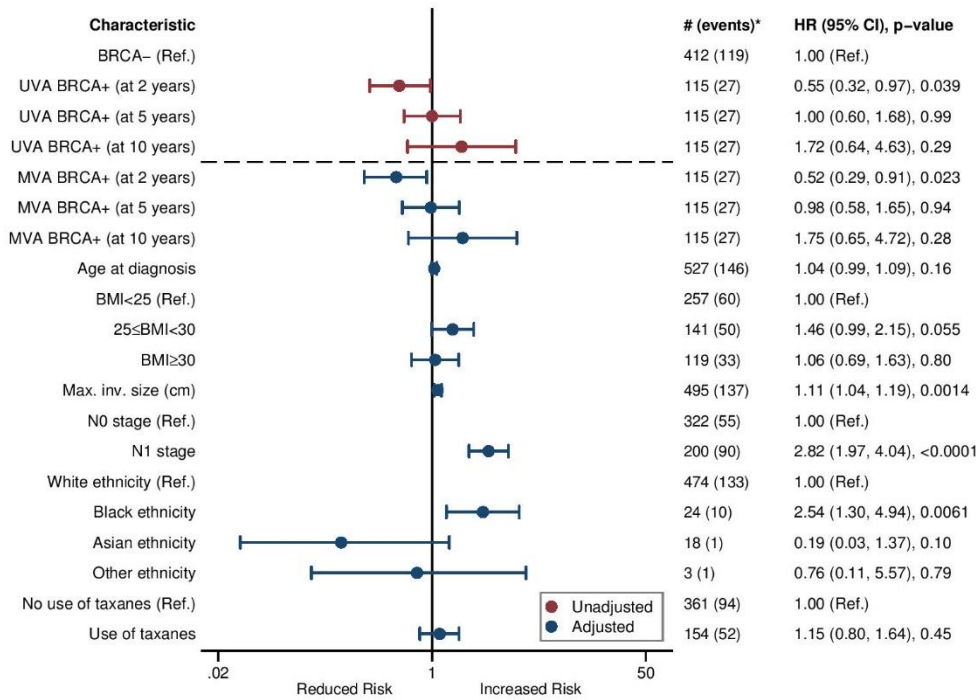

\*Number of patients (events experienced) from complete data prior to multiple imputation

**Appendix Figure 9 – Overall Survival by BRCA status for TNBC patients who did not develop a new primary breast or ovarian cancer (TNBC population, excluding patients who developed a new primary breast or ovarian cancer)**

Forest Plot of univariable and multivariable hazard ratios by BRCA+/- status for Overall Survival (OS). Multivariable analysis is adjusted for age, body mass index, tumour size, ethnicity and use of taxane chemotherapy.

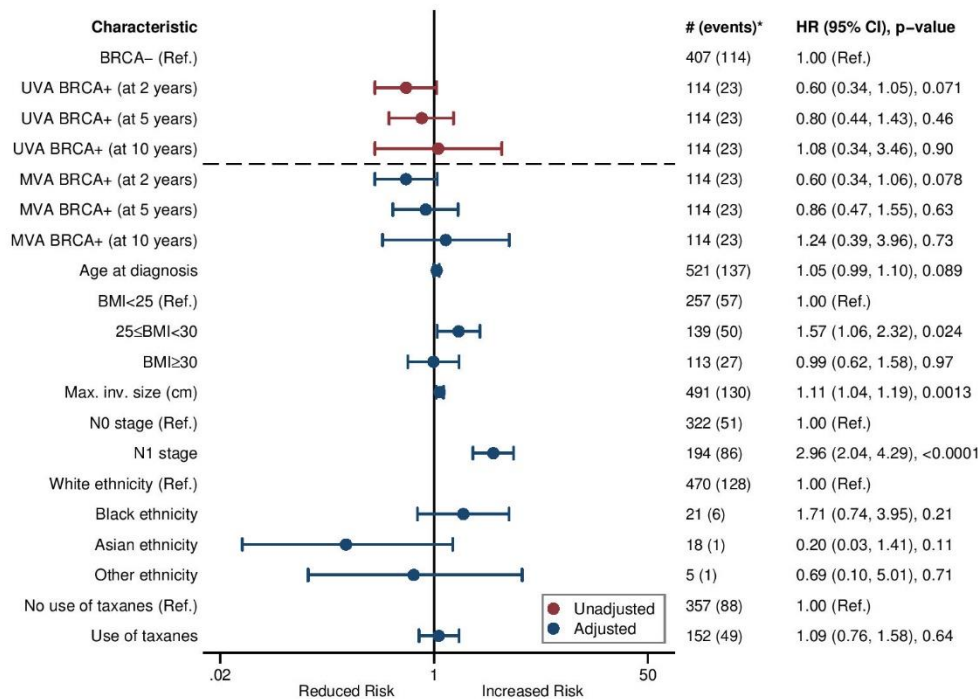

\*Number of patients (events experienced) from complete data prior to multiple imputation

## Appendix - Methods

### Appendix Methods 1: BRCA1 and BRCA2 gene sequencing and variant calling

Details of sequencing methodology and annotation of variants.

Amplicon design, enrichment, sequencing, and variant calling:

All POSH study cases with a DNA sample submitted were included. Fluidigm targeted DNA amplification assay design software (Fluidigm, South San Francisco, California, USA) was used to select PCR  $\leq 235$ bp amplicons covering all exons, splice junctions and UTRs of the BRCA1 and BRCA2 genes. These 261 amplicons were part of a larger multiplex panel of 1,122 amplicons covering 35 genes (manuscript in preparation). Using the Fluidigm software, primer pairs were multiplexed into 20 pools. The Fluidigm Juno Access Array 192.24 system was used for library preparation, according to the manufacturer's protocols (Fluidigm, South San Francisco, California, USA). Target sequences were amplified, then one of 1,536 unique sample barcodes and Illumina sequencing adaptors were ligated (supplied by Fluidigm, South San Francisco, California, USA). Liquid handling robotics and barcode plate identification were used in all steps of the library preparation process. Each library of 1,536 samples was quantified with the KAPA Library Quantification Kit (KapaBiosystems, Boston, Massachusetts, USA) and then sequenced in 150-base paired-end mode on a single lane of an Illumina Hi-Seq2000 instrument using v4 chemistry, according to the manufacturer's protocols (Illumina, San Diego, California, USA).

Raw sequence data were converted to FASTQ format and demultiplexed using the Illumina CASAVA v1.8 pipeline (Illumina, San Diego, California, USA). CutAdapt v1.5[1] was used for orientation-specific, end-wise primer sequence trimming, and untrimmed reads were discarded. Reads were aligned to the hg19 human reference sequence with BWA-MEM v0.7.[2]. Both SAMtools and GATK v3.3[3] was used for local insertion-deletion variant (indel) realignment and base quality score recalibration. Using intervals containing one or more full exons, GATK UnifiedGenotyper was used to perform SNP and indel discovery and variant calling across all samples simultaneously, according to the GATK best practice recommendations [4, 5]. We also called variants using a case by case approach which gave improved sensitivity and reduced specificity.

Sample and variant quality control (QC) filtering:

VCFtools[6] was used to first remove all variants with  $>20\%$  missing calls, and then all samples with missing data for  $>20\%$  of remaining variants. GATK was used to recalculate variant-level quality metrics for only the retained samples, and variant positions with quality by depth  $<3$  or  $>25$  were excluded. Genotypes with depth  $<20$  or genotype quality  $<13$  were recoded as no call using VCFtools. Finally, samples and then variants with  $>5\%$  missing calls were excluded. After all filtering, 5,488/5,952 controls (92%) and 13,087/13,824 cases (95%) were retained for further analysis.

Indels with more than three alleles were removed. Potentially problematic variants, including indels longer than 1-bp in length, indels within 10-bp of one another, dinucleotide substitutions, and rare variants (defined by carrier frequency  $<0.1\%$  in the ExAC Non-Finnish European dataset) for which one or more samples was called homozygous, were inspected manually in the Integrative Genome Viewer (IGV).[7] Where there were discrepancies between UnifiedGenotyper calls and the IGV inspection, the IGV-based variant call was used.

Functional prediction and variant frequency classification:

The Ensembl Variant Effect Predictor (VEP)[8] was used to assign the canonical transcript- and protein-level consequence for each variant. Frameshift, stop/gain, and canonical splice variants (i.e. positions -1, -2, +1 or +2) were considered as protein truncating. Missense variants were further annotated with effect predictions from CADD,[9] PolyPhen2,[10] SIFT,[11] and AlignGVGD,[12] a cancer gene-specific missense variant effect prediction tool. The consequences of the putative splice site variant CHEK2 c.320-5T>A were evaluated using the in silico prediction tools SpliceSiteFinder-like,[13] MaxEntScan,[14] NNSPLICE,[15] GeneSplicer,[16] and Human Splicing Finder.[17]

Coverage, quality, and variant call concordance metrics:

Per-sample and per-base mean sequence coverage were tabulated with BEDTools.[19]. For each sample, the GATK "callable loci" script was used to calculate the percentage of exonic bases with at least 20 reads and a minimum base quality of 20. The accuracy of variant calling was assessed by Sanger sequencing to estimate the false positive rate (positive predictive value, PPV). Sanger sequencing primers with M13 sequence tags were designed. Sanger calls were checked against NGS results, and discrepancies were resolved via comparison of results and inspection of reads in IGV. Genotypes were successfully validated for 188/188 samples carrying SNVs (positive predictive value=100.0%) and 67/68 samples carrying indels (positive predictive value=98.5%).

### Appendix Methods 1 – References:

1 Martin M. Cutadapt removes adapter sequences from high-throughput sequencing reads. EMBnet.journal 2011;17:10.

- 2 Li H. Exploring single-sample SNP and INDEL calling with whole-genome de novo assembly. *Bioinformatics* 2012;28:1838–44.
- 3 McKenna A, Hanna M, Banks E, Sivachenko A, Cibulskis K, Kernytsky A, *et al.* The Genome Analysis Toolkit: a MapReduce framework for analyzing next-generation DNA sequencing data. *Genome Res* 2010;20:1297–303.
- 4 DePristo MA, Banks E, Poplin R, Garimella K V, Maguire JR, Hartl C, *et al.* A framework for variation discovery and genotyping using next-generation DNA sequencing data. *Nat Genet* 2011;43:491–8.
- 5 Van der Auwera GA, Carneiro MO, Hartl C, Poplin R, del Angel G, Levy-Moonshine A, *et al.* From FastQ Data to High-Confidence Variant Calls: The Genome Analysis Toolkit Best Practices Pipeline. In: *Current Protocols in Bioinformatics*. John Wiley & Sons, Inc. 2013. 43:11.10.1-11.10.33.
- 6 Danecek P, Auton A, Abecasis G, Albers CA, Banks E, DePristo MA, Handsaker RE, Lunter G, Marth GT, Sherry ST, McVean G, Durbin R, 1000 Genomes Project Analysis Group. The variant call format and VCFtools. *Bioinformatics* 2011;27:2156–8.
- 7 Robinson JT, Thorvaldsdóttir H, Winckler W, Guttman M, Lander ES, Getz G, Mesirov JP. Integrative genomics viewer. *Nat Biotechnol* 2011;29:24–6.
- 8 McLaren W, Pritchard B, Rios D, Chen Y, Flicek P, Cunningham F. Deriving the consequences of genomic variants with the Ensembl API and SNP Effect Predictor. *Bioinformatics* 2010;26:2069–70.
- 9 Kircher M, Witten DM, Jain P, O’Roak BJ, Cooper GM, Shendure J. A general framework for estimating the relative pathogenicity of human genetic variants. *Nat Genet* 2014;46:310–5.
- 10 Adzhubei IA, Schmidt S, Peshkin L, Ramensky VE, Gerasimova A, Bork P, Kondrashov AS, Sunyaev SR. A method and server for predicting damaging missense mutations. *Nat Methods* 2010;7:248–9.
- 11 Ng PC, Henikoff S. Predicting deleterious amino acid substitutions. *Genome Res* 2001;11:863–74.
- 12 Tavtigian S V, Deffenbaugh AM, Yin L, Judkins T, Scholl T, Samollow PB, de Silva D, Zharkikh A, Thomas A. Comprehensive statistical study of 452 BRCA1 missense substitutions with classification of eight recurrent substitutions as neutral. *J Med Genet* 2006;43:295–305.
- 13 Zhang MQ. Statistical features of human exons and their flanking regions. *Hum Mol Genet* 1998;7:919–32.
- 14 Yeo G, Burge CB. Maximum entropy modeling of short sequence motifs with applications to RNA splicing signals. *J Comput Biol* 2004;11:377–94.
- 15 Reese MG, Eeckman FH, Kulp D, Haussler D. Improved Splice Site Detection in Genie. *J Comput Biol* 1997;4:311–23.
- 16 Pertea M, Lin X, Salzberg SL. GeneSplicer: a new computational method for splice site prediction. *Nucleic Acids Res* 2001;29:1185–90.
- 17 Desmet F-O, Hamroun D, Lalande M, Collod-Bérout G, Claustres M, Bérout C. Human Splicing Finder: an online bioinformatics tool to predict splicing signals. *Nucleic Acids Res* 2009;37:e67.
- 18 Lek M, Karczewski KJ, Minikel E V, Samocha KE, Banks E, Fennell T, *et al.* Analysis of protein-coding genetic variation in 60,706 humans. *Nature* 2016;536:285–91.
- 19 Quinlan AR, Hall IM. BEDTools: a flexible suite of utilities for comparing genomic features. *Bioinformatics* 2010;26:841–2.
- 20 Michailidou K, Hall P, Gonzalez-Neira A, Ghoussaini M, Dennis J, Milne RL, *et al.* Large-scale genotyping identifies 41 new loci associated with breast cancer risk. *Nat Genet* 2013;45:353–61.
- 21 Amos CI, Dennis J, Wang Z, Byun J, Schumacher FR, Gayther SA, *et al.* a Network for Understanding the Genetic Architecture of Common Cancers. *Cancer Epidemiol Biomarkers Prev* Published Online First: 3 October 2016. doi:10.1158/1055-9965.EPI-16-0106

## Appendix - Documents

### Appendix Document 1: Statistical Analysis Plan

Statistical analysis plan (SAP), approved on 10-May-2016, and formatted for Lancet Oncology Appendix.

*[Please note: Figures in this SAP are taken from the POSH data available up until June 2015, and thus only represent approximations of the new data due to be downloaded from the POSH database in 2016/2017.]*

Please note: This statistical analysis plan has been written in the past tense because it will form the basis of a paper. The headings used in this document come from the STROBE reporting guideline for observational studies (see <http://www.strobe-statement.org/> or <http://www.annals.org/content/147/8/W-163.full.pdf+html>).

### Statistical Analysis Plan Version

| Issue no | Revision History                                                                                                                                      | Author                                  | Date                      |
|----------|-------------------------------------------------------------------------------------------------------------------------------------------------------|-----------------------------------------|---------------------------|
| 0.1      | First draft written based on discussion at meeting on 8 <sup>th</sup> Oct 2010                                                                        | Louise Stanton (née Dent)               | 20 <sup>th</sup> Oct 2010 |
| 0.2      | Additional comments and annotations                                                                                                                   | Diana Eccles, Sue Gerty                 | 13 <sup>th</sup> Oct 2010 |
| 0.3      | Further notes on confounding factors and example figures for POSH cohort added                                                                        | Diana Eccles                            | 25 <sup>th</sup> Nov 2010 |
| 0.4      | Updated based on meeting with Diana Eccles and Sue Gerty on the 29 <sup>th</sup> Oct 2010 and meeting with Sue Gerty on 9 <sup>th</sup> December 2010 | Louise Stanton (née Dent)               | 17 <sup>th</sup> Dec 2010 |
| 0.5      | Updated based on comments from Doug Altman                                                                                                            | Louise Stanton (née Dent)               | 21 <sup>st</sup> Feb 2011 |
| 0.6      | Updated based on discussions                                                                                                                          | Diana Eccles, Louise Stanton (née Dent) | 24 <sup>th</sup> Feb 2011 |
| 0.7      | Updated based on meeting with Louise Stanton (née Dent) on 21 <sup>st</sup> March 2012                                                                | Tom Maishman                            | 30 <sup>th</sup> Mar 2012 |
| 0.8      | Updated based on comments from Diana Eccles                                                                                                           | Tom Maishman                            | 2 <sup>nd</sup> Apr 2012  |
| 0.9      | Updated following a meeting with Doug Altman, Diana Eccles and Louise Stanton (née Dent)                                                              | Tom Maishman                            | 18 <sup>th</sup> Mar 2013 |
| 0.10     | Updated following planned updates to obtain further BRCA testing information                                                                          | Tom Maishman                            | 30 <sup>th</sup> Jun 2015 |
| 0.11     | Updated following comments from Diana Eccles and Ellen Copson                                                                                         | Tom Maishman                            | 14 <sup>th</sup> Jul 2015 |
| 0.12     | Updated following comments from Diana Eccles and Ellen Copson                                                                                         | Tom Maishman                            | 28 <sup>th</sup> Jul 2015 |
| 0.13     | Updated following meeting with Doug Altman on 30 <sup>th</sup> July 2015                                                                              | Tom Maishman                            | 7 <sup>th</sup> Aug 2015  |
| 1        | Finalised using v0.13                                                                                                                                 | Tom Maishman                            | 10 <sup>th</sup> May 2016 |

## 1. Introduction

### 1.1 Background / Rationale

BRCA1 and BRCA2 are the most frequently reported highly penetrant monogenic factors that predispose to breast cancer. Both genes also predispose to ovarian cancer. Mutation in either gene has been shown to lead to higher grade breast cancer than average and to young age at onset (median age for BRCA1 is 43 years and for BRCA2 is 48 years compared to the population mean age at diagnosis of about 60 years). In addition for BRCA1 associated breast cancer, the proportion of oestrogen receptor negative cancers is much higher than average (80-90% compared to ~ 30% amongst breast cancers in women diagnosed < 50 years of age). There are conflicting conclusions in the literature exploring whether BRCA1 or BRCA2 mutation carriers develop breast cancers with a better or worse prognosis. Most reported studies are small, retrospective and with incomplete data on many of the factors known to influence breast cancer outcomes. Some of the early reports of better survival failed to recognise or adequately account for survival bias in many of the BRCA tested patients. Knowledge of a family history of breast cancer, even without genetic testing may lead to earlier diagnosis of breast cancer due to heightened awareness and early presentation and investigation; this bias may lead to observations of improved survival in BRCA gene carriers. The adverse pathological features associated with breast cancers diagnosed in BRCA gene carriers may account for observations of a worsened prognosis in gene carriers compared with the average.. A differentially better or worse response to adjuvant chemotherapy in relation to the underlying genetic predisposition may also affect prognosis. It is important to understand the overall effect of genetic predisposition factors on prognosis in order to better inform gene carriers making decisions about primary prevention and about cancer treatment and to help design more informative prospective clinical trials of both conventional and novel targeted treatments. The Prospective study of Outcomes in Sporadic versus Hereditary breast cancer (POSH) is a large contemporary cohort study of breast cancer cases diagnosed before 41 years of age and designed to investigate the effect of genetic factors on breast cancer prognosis.

## 1.2 Objectives

This paper presents the results from analyses carried out on data collected from the POSH study.

The primary objective was:

- To investigate whether patients with early breast cancer and an inherited BRCA1 or BRCA2 gene mutation (BRCA-Positive [BRCA+]) have a superior Overall Survival (OS) than patients without a BRCA1 or BRCA 2 mutation (BRCA-Negative [BRCA-]).

Secondary objectives were:

- To investigate whether BRCA+ patients with early breast cancer have a superior Distant Disease Free Survival (DDFS) than BRCA- patients.
- To investigate whether BRCA+ patients with early breast cancer have a superior Post Distant Relapse Survival (PDRS) than BRCA- patients.
- To investigate whether patients with early breast cancer and an inherited BRCA1 gene mutation (BRCA1-Positive [BRCA1+]) have a superior OS than patients without a BRCA1 mutation (BRCA1-Negative [BRCA1-])<sup>1</sup>.
- To investigate whether BRCA1+ patients with early breast cancer have a superior DDFS than BRCA1- patients.
- To investigate whether BRCA1+ patients with early breast cancer have a superior PDRS than BRCA1- patients.
- To investigate whether patients with early breast cancer and an inherited BRCA2 gene mutation (BRCA2-Positive [BRCA2+]) have a superior OS than patients without a BRCA2 mutation (BRCA2-Negative [BRCA2-])<sup>2</sup>.
- To investigate whether BRCA2+ patients with early breast cancer have a superior DDFS than BRCA2- patients.
- To investigate whether BRCA2+ patients with early breast cancer have a superior PDRS than BRCA2- patients.
- To investigate whether Triple Negative (TNT)<sup>3</sup> BRCA+ patients with early breast cancer have a superior OS than TNT BRCA- patients.
- To investigate whether TNT BRCA+ patients with early breast cancer have a superior DDFS than TNT BRCA- patients.
- To investigate whether TNT BRCA+ patients with early breast cancer have a superior PDRS than TNT BRCA- patients.
- To investigate whether BRCA+ patients with early breast cancer have a superior DDFS than BRCA- patients when adjusting for chemotherapy.

<sup>1</sup> This comparison excludes patients with a BRCA2 positive gene mutation.

<sup>2</sup> This comparison excludes patients with a BRCA1 positive gene mutation.

<sup>3</sup> Triple Negative Patients defined as Patients with a HER2 negative status, ER negative status and either a PR negative status or PR missing/unknown status i.e. patients with a confirmed PR positive status are excluded.

## 2. Methods

### 2.1 Study Design

The POSH study is a prospective cohort study. The protocol for the study can be found in the following journal article <http://www.biomedcentral.com/1471-2407/7/160>.

### 2.2 Setting

The POSH study recruited women from breast cancer units across England, Scotland, Wales and Northern Island between 1<sup>st</sup> June 2001 to 31<sup>st</sup> January 2008.

### 2.3 Participants

The study recruited 3052 women aged 40 years or younger at breast cancer diagnosis. The women had to have been diagnosed with breast cancer between January 2000 and January 2008. In addition, 43 women aged 41-50 were also included if they had a known BRCA1 or BRCA2 gene mutation and were diagnosed with invasive breast cancer within the study period were excluded for this analysis. Women were excluded if they had a previous invasive malignancy (with the exception of non-melanomatous skin cancer), were not available for follow up or refused consent to retain diagnostic and follow up data. Genetic testing was performed on xxx women. Those not tested were excluded from the additional comparison. Patients with confirmed M1 stage (n=74) were also excluded. A total of 2925 women were included in the analysis population.

Clinical follow up data were obtained from the patient medical records by the clinical trials practitioner (CTP) at each recruiting centre. Data forms collecting information at diagnosis, 6 months, 12 months were completed by the CTP usually at 12 months from diagnosis. Annual data collection was continued from the date of definitive diagnosis until death, loss to follow up or until the end of the current phase of the study (mmm yyyy).



Family history data: patients in the POSH study completed a family history questionnaire (<http://www.biomedcentral.com/1471-2407/7/160> supplementary figure). The web-based and validated genetic risk prediction software BOADICEA (Antoniou A, et al 2008. Predicting the likelihood of carrying a BRCA1 or BRCA2 mutation: validation of BOADICEA, BRCAPRO, IBIS, Myriad and the Manchester scoring system using data from UK genetics clinics. J Med Genet. Jul;45(7):425-31) was used to process pedigree data and generate a predicted likelihood that each patient might carry a BRCA1/2 mutation. No family history was provided for 106 of the 2956 patients. BOADICEA scores for the remaining 2850 patients were calculated from the family history of the proband at the time she presented with breast cancer. A total of 1939 (66%) scored below 0.05, 372 (13%) scored 0.05-0.099, 226 (8%) scored 0.10-0.199 and 314 (11%) scored 0.20 or over. BOADICEA scores for the xxx patients were calculated from the family history of the proband at the time she presented with breast cancer.

Genetic testing results for BRCA1/2 were already available through clinical test reports or other research sub-studies in xxx cases and these data were used to validate the sensitivity and specificity of the Fluidigm technology used across the cohort. Mutation testing was carried out on all patients recruited to the study for whom a DNA sample was available (n=xxx). A panel of genes was tested using Fluidigm targeted sequence capture and next generation sequencing with additional analysis using Multiple Ligation Probe Analysis (MLPA) to detect large exonic deletions or duplications where there was either a greater than 10% estimated probability of an underlying BRCA1/2 gene mutation (estimated using BOADICEA) or where there was evidence from the Fluidigm assay of a large deletion or duplication. Only mutations that were clearly pathogenic were used to assign gene carriers to the relevant group for analysis purposes.

## 2.4 Variables (data taken as of June 2015)

| Variable                                                                                                 | Type of data / categories                                                                                                                                                                                                                                                       | Amount of missing data (Analysis Group A – see Section 2.8, n=2873)                                                                                             | Amount of missing data (Analysis Group B – see Section 2.8, n=725)                                                                                              | Possible reasons for missing data                                                                                                                                                                 |
|----------------------------------------------------------------------------------------------------------|---------------------------------------------------------------------------------------------------------------------------------------------------------------------------------------------------------------------------------------------------------------------------------|-----------------------------------------------------------------------------------------------------------------------------------------------------------------|-----------------------------------------------------------------------------------------------------------------------------------------------------------------|---------------------------------------------------------------------------------------------------------------------------------------------------------------------------------------------------|
| <b>2.4.1 Primary outcome</b>                                                                             |                                                                                                                                                                                                                                                                                 |                                                                                                                                                                 |                                                                                                                                                                 |                                                                                                                                                                                                   |
| Time to death from any cause                                                                             | Survival data<br>Date of death from any cause – Date of invasive breast cancer diagnosis                                                                                                                                                                                        | N/A, patients who haven't died will be censored at the date of their last follow up visit                                                                       | N/A, patients who haven't died will be censored at the date of their last follow up visit                                                                       | N/A                                                                                                                                                                                               |
| <b>2.4.2 Secondary outcomes</b>                                                                          |                                                                                                                                                                                                                                                                                 |                                                                                                                                                                 |                                                                                                                                                                 |                                                                                                                                                                                                   |
| Time to distant relapse or death from any cause                                                          | Survival data<br>Date of first distant relapse (or death from any cause) – Date of invasive breast cancer diagnosis                                                                                                                                                             | N/A, patients who haven't relapsed or died will be censored at the date of their last follow up visit                                                           | N/A, patients who haven't relapsed or died will be censored at the date of their last follow up visit                                                           | N/A                                                                                                                                                                                               |
| Time from first relapse to death from any cause                                                          | Survival data<br>Date of death from any cause – Date of first distant relapse                                                                                                                                                                                                   | N/A, patients who haven't relapsed will not be included. Patients who have relapsed and haven't died will be censored at the date of their last follow up visit | N/A, patients who haven't relapsed will not be included. Patients who have relapsed and haven't died will be censored at the date of their last follow up visit | N/A                                                                                                                                                                                               |
| <b>2.4.3 Candidate predictor</b>                                                                         |                                                                                                                                                                                                                                                                                 |                                                                                                                                                                 |                                                                                                                                                                 |                                                                                                                                                                                                   |
| Genetic status <sup>1</sup>                                                                              | Categorical<br>For the main comparison, each patient is assigned one of 3 categories:<br>BRCA 1 gene carrier confirmed by genetic testing (n=xxx)<br>BRCA 2 gene carrier confirmed by genetic testing (n=xxx)<br>TP53 (n=xxx)<br>No mutation found/variant unknown significance | TBA                                                                                                                                                             | TBA                                                                                                                                                             | TBA                                                                                                                                                                                               |
| <b>2.4.4 Potential confounders / effect modifiers - measured at breast cancer diagnosis presentation</b> |                                                                                                                                                                                                                                                                                 |                                                                                                                                                                 |                                                                                                                                                                 |                                                                                                                                                                                                   |
| 1. Age at diagnosis                                                                                      | Continuous, in years                                                                                                                                                                                                                                                            | 0 records                                                                                                                                                       | 0 records                                                                                                                                                       | N/A                                                                                                                                                                                               |
| 2. Body Mass Index (BMI)                                                                                 | Categorical<br>Underweight/Healthy, Overweight, Obese, or missing/unknown                                                                                                                                                                                                       | 108 (3.8%) records                                                                                                                                              | 15 (2.1%) records                                                                                                                                               | Consider MAR                                                                                                                                                                                      |
| 3. Histological Tumour grade                                                                             | Categorical<br>1, 2, 3, or not graded/missing/unknown                                                                                                                                                                                                                           | 70 (2.4%) records not graded/missing/unknown                                                                                                                    | 19 (2.6%) records not graded/missing/unknown                                                                                                                    | MCAR. Inadequate reporting by pathologist. If grade of core biopsy tumour not stated, and after neo-adjuvant chemotherapy there was a complete pathological response then no tumour to report on. |
| 4. Maximum tumour diameter invasive (tumour size)                                                        | Continuous, in mm or<br>Categorical<br><15mm, 15mm to 20mm, >20mm to 35mm, >35mm to                                                                                                                                                                                             | 162 (5.6%) records                                                                                                                                              | 53 (7.3%) records                                                                                                                                               | Missing for similar reasons as tumour grade (MCAR)                                                                                                                                                |

| Variable                                        | Type of data / categories                                                                                   | Amount of missing data (Analysis Group A – see Section 2.8, n=2873) | Amount of missing data (Analysis Group B – see Section 2.8, n=725) | Possible reasons for missing data                                                                                                                                        |
|-------------------------------------------------|-------------------------------------------------------------------------------------------------------------|---------------------------------------------------------------------|--------------------------------------------------------------------|--------------------------------------------------------------------------------------------------------------------------------------------------------------------------|
|                                                 | 50mm, >50mm, or missing/unknown                                                                             |                                                                     |                                                                    |                                                                                                                                                                          |
| 5. Pathological N stage (lymph node status)     | Categorical N0, N1 or missing/unknown                                                                       | 31 (1.1%) records                                                   | 10 (1.4%) records                                                  | MCAR. No axillary surgery, no lymph nodes in resected specimen.                                                                                                          |
| 6. Number of positive Lymph nodes               | Categorical 0, 1-3, 4-9, 10+, or missing/unknown                                                            | 31 (1.1%) records                                                   | 10 (1.4%) records                                                  | Same as above (MCAR)                                                                                                                                                     |
| 7. Lymphovascular invasion                      | Categorical Present, absent or missing/unknown                                                              | 203 (7.1%) records                                                  | 58 (8.0%) records                                                  | Poor reporting. Consider as MCAR.                                                                                                                                        |
| 8. M stage                                      | Categorical M0, M1 or missing/unknown                                                                       | 22 (0.8%) records                                                   | 5 (0.7%) records                                                   | MCAR, likely to be M0 as only 2.1% of patients are M1.                                                                                                                   |
| 9. Oestrogen receptor (ER) <sup>1</sup>         | Categorical Negative, positive, or missing/unknown                                                          | 11 (0.4%) records                                                   | 0 records                                                          | N/A                                                                                                                                                                      |
| 10. HER2 <sup>2</sup>                           | Categorical Negative, positive, or missing/unknown                                                          | 352 (12.3%) records                                                 | 0 records                                                          | Missing because diagnosis predated routine testing and patient has not suffered a further breast cancer event since initial diagnosis. Consider Missing At Random (MAR). |
| 11. PR <sup>3</sup>                             | Categorical Negative, positive, or missing/unknown                                                          | 564 (19.6%) records                                                 | 85 (11.7%) records                                                 | MAR. Missing because specific centres don't do PR IHC.                                                                                                                   |
| 12. Ethnicity                                   | Categorical Caucasian/White, Black, Asian, Other, or missing/unknown                                        | 41 (1.4%) records                                                   | 8 (1.1%) records                                                   | Consider MAR                                                                                                                                                             |
| Diagnosis Year                                  | Categorical ≤2005 or >2005                                                                                  | 0 records                                                           | 0 records                                                          | N/A                                                                                                                                                                      |
| Adjuvant or neo-adjuvant chemotherapy indicator | Categorical Yes or No/missing/unknown                                                                       | 0 records                                                           | 0 records                                                          | N/A                                                                                                                                                                      |
| Chemotherapy with taxane indicator              | Categorical Yes or No/missing/unknown                                                                       | 0 records                                                           | 0 records                                                          | N/A                                                                                                                                                                      |
| 17. Focality (distribution of tumour)           | Categorical Multifocal, localised or missing/unknown                                                        | 61 (8.0%) records                                                   | 286 (9.7%) records                                                 | Missing for similar reasons as tumour grade (MCAR).                                                                                                                      |
| 18. Definitive surgery                          | Categorical Breast Conserving Surgery (BCS), Mastectomy, No surgery, Nodal surgery only, or missing/unknown | 0 records                                                           | 0 records                                                          | N/A                                                                                                                                                                      |
| 19. Chemotherapy regimen                        | Categorical Anthracyclines, A&T, Taxanes, Other, or None                                                    | 0 records                                                           | 0 records                                                          | N/A                                                                                                                                                                      |

#### 2.4.5 Additional (descriptive) variables

|                         |                       |           |           |     |
|-------------------------|-----------------------|-----------|-----------|-----|
| 13. Length of follow-up | Continuous, in months | 0 records | 0 records | N/A |
|-------------------------|-----------------------|-----------|-----------|-----|

#### Amount of missingness in the multivariable models

|                                                                                             |             |             |  |
|---------------------------------------------------------------------------------------------|-------------|-------------|--|
| No. of pts with at least 1 variable with missing data from the MV model 1 (see Section 2.8) | 596 (20.7%) | 155 (21.4%) |  |
| No. of pts with at least 1 variable with missing data from the MV model 2 (see Section 2.8) | 610 (21.2%) | 159 (21.9%) |  |

<sup>1</sup> Not all patients in the POSH study had genetic testing (in the same way not all patients do currently in the NHS). BOADICEA scores were calculated purely based on family history data from the patient family history questionnaire; no information about mutation testing was included in the estimates. Patients with a combined (BRCA1 and BRCA2) score of <0.05 had no significant family history of cancer. Scores above 0.10 would be eligible for testing according to American Society of Oncology guidelines and scores above 0.10 are eligible for testing under the 2013 UK NICE guidelines.

<sup>2</sup> Oestrogen receptor allocation of result from POSH database to Oestrogen receptor category:

| Result            | Category result assigned to |
|-------------------|-----------------------------|
| Negative          | Negative                    |
| Borderline        | Negative                    |
| Strongly Positive | Positive                    |
| Positive          | Positive                    |
| Weakly positive   | Negative*                   |
| Not done          | Not done                    |
| Unknown           | Missing/unknown             |
| Null              | Missing/unknown             |

\*For ER, weakly positive (which we assume equates to an Allred score of 1-2) has been treated as ER negative, and an Allred score of 3+ treated as ER positive. However it is possible that reviewers will disagree so we can reclassify this as positive if required.

<sup>3</sup> HER2 allocation of result from POSH database to a HER2 category:

| Result               | Category result assigned to |
|----------------------|-----------------------------|
| FISH/CISH positive   | Positive**                  |
| 3+                   | Positive                    |
| FISH/CISH borderline | Negative**                  |
| 2+                   | Negative                    |
| FISH/CISH negative   | Negative**                  |
| 1+                   | Negative                    |
| 0                    | Negative                    |
| Not done             | Not done                    |
| Unknown              | Missing/unknown             |

\*\* FISH/CISH results take precedence i.e. a 2+ result which is later found to have a FISH/CISH positive result is categorised as Positive rather than Borderline.

<sup>4</sup> PR allocation of result from POSH database to a PR category:

| Result            | Category result assigned to |
|-------------------|-----------------------------|
| Negative          | Negative                    |
| Borderline        | Negative                    |
| Strongly Positive | Positive                    |
| Positive          | Positive                    |
| Weakly positive   | Negative***                 |
| Not done          | Not done                    |
| Unknown           | Missing/unknown             |
| Null              | Missing/unknown             |

\*\*\*For PR, weakly positive (which we assume equates to an Allred score of 1-2) has been treated as PR negative. However it is possible that reviewers will disagree so we can reclassify this as positive if required

## 2.5 Data sources/measurement

The tumour biopsy, definitive histopathological report, clinical and radiological reports were all submitted to the study. Pathological characteristics of the tumours were taken from the diagnostic histopathology report, clinical staging from the clinical and radiological reports.

National death data were obtained for patients in the cohort from the Medical Research Information Service (MRIS).

ER, PR and HER2 data were taken from pathology reports. Scoring systems varied as expected across contributing hospitals. Positive and Negative categories are straightforward however borderline results exist in all three IHC categories and were classified into a separate borderline group. The borderline category was merged with negative for the purposes of these analyses. Additional IHC data for these three markers was available from the Tissue Micro Arrays (TMAs) constructed from tumour pathology blocks for study participants which were used to populate these missing clinical data fields.

This paper presents the results of analyses conducted on follow up data available up until dd-mmm-yyyy.

## 2.6 Bias

Clinical data for all patients were collected via standard clinical research forms which were completed from the clinical notes by the Clinical Trials Practitioner in each centre.

HER2 data: There are concerns regarding the amount of missing HER2 data obtained. In addition:

- HER2 Testing was only widely introduced after 2006 (proportion tested prior to 2006 was 83% (1704/2041), proportion tested on/after 2006 was 98% (897/915)). Prior to 2006 HER2 testing was more likely to have been carried out in patients who had progressed (93% i.e. 520 tested out of 561 who progressed, compared to 80% i.e. 1184 tested out of 1480 who had not progressed). Therefore, patients for whom we knew their HER2 status were more likely to have had a worse prognosis. Hence, if we selected patients on the basis of HER2 testing and compared them to patients who may or may not have been HER2 tested this would have been biased as the patients who have been HER2 tested could look worse by comparison.
- In addition, any analyses that select any patients which have a known HER2 status (which includes patients diagnosed before 2006) will include more cases who had relapsed (and were therefore tested for HER2 amplification retrospectively) than the whole cohort which could potentially compromise the validity of results.

## 2.7 Study Size

This is covered in the BMC paper.

## 2.8 Statistical Methods

### Patients excluded from the analyses

Patients were excluded from this analysis if we didn't have confirmation that they had invasive cancer from pathology results or were missing primary data (21 patients). Genetic testing was performed on xxx women. Those not tested were excluded from the additional comparison. Patients with confirmed M1 stage (n=74) were also excluded. A total of 2925 women were included in the analysis population, of which:

- n=2873 were aged 40 years or younger at diagnosis without a TP53 gene mutation (**Analysis Group A**);
- n=725 were aged 40 years or younger at diagnosis without a TP53 gene mutation and had a TNT status (**Analysis Group B**);
- n=43 were aged 41-50 years at diagnosis with a confirmed gene mutation (**Analysis Group C**);
- n=9 were aged 40 years or younger at diagnosis and had a TP53 gene mutation (**Analysis Group D**).

### Primary outcome measure

Overall Survival (OS) where OS is defined as the time from the date of invasive breast cancer diagnosis to death from any cause. Patients who had not died will be censored at their date of last follow up. For this analysis we will not include new primary breast cancer diagnoses as distant relapse events in the primary outcome analysis.

### Secondary outcome measures

Distant Disease Free Survival (DDFS) where DDFS is defined as the time from the date of invasive breast cancer diagnosis to distant relapse or death from any cause. Distant relapse is defined as breast cancer recurrence at distant sites including supraclavicular lymph nodes, visceral, CNS and bone metastases. Patients who had not died or relapsed at the time of analysis will be censored at their date of last follow up. For this analysis we will not include new primary breast cancer diagnoses as distant relapse events in the secondary outcome analysis.

Post Distant Relapse Survival (PDRS) where PDRS is defined as the time from the date of distant relapse to death from any cause. Distant relapse is defined as breast cancer recurrence at distant sites including supraclavicular lymph nodes, visceral, CNS and bone metastases. Patients who had not died will be censored at their date of last follow up. For this analysis we will not include new primary breast cancer diagnoses as distant relapse events in the secondary outcome analysis.

### Univariate analyses

Where specified for analysis groups A, B, C and D above, we summarised patient and tumour characteristics by the following:

- All patients (**Analysis Groups A, B, C and D**)
- BRCA1+ patients (**Analysis Groups A, B and C** only)
- BRCA2+ patients (**Analysis Groups A, B and C** only)
- BRCA+ patients (**Analysis Groups A and B** only)
- BRCA- patients (**Analysis Groups A and B** only)

For analysis groups A and B, we summarised and produced Kaplan Meier survival curves of OS, DDFS, and PDRS and compared the survival curves using a log rank test for the following:

- BRCA+ versus BRCA-
- BRCA1+ versus BRCA1- (excluding BRCA2+ patients)
- BRCA2+ versus BRCA2- (excluding BRCA1+ patients)

For analysis group C, we summarised and produced Kaplan Meier survival curves of OS, DDFS, and PDRS and compared the survival curves using a log rank test for BRCA1+ versus BRCA2+ patients.

### Multivariable analyses

Comparison groups:

- BRCA+ versus BRCA- (**analysis Group A**)
- BRCA1+ versus BRCA1- (excluding BRCA2+ patients) (**analysis Group A**)
- BRCA2+ versus BRCA2- (excluding BRCA1+ patients) (**analysis Group A**)
- TNT BRCA+ versus TNT BRCA- (**analysis Group B**)

For the comparisons i) to iv) above, we fitted a multivariable model for OS and DDFS adjusting for the following covariates:

- Age at diagnosis, in years (fitted as a continuous covariate);
- Body Mass Index (BMI) (fitted as a categorical covariate [Underweight/Healthy, Overweight or Obese]);
- Histological Grade (fitted as a categorical covariate [1, 2 or 3]);
- Maximum invasive tumour size, in mm (fitted as a continuous covariate);
- N stage (fitted as a binary covariate [N0 or N1]);
- ER status (fitted as a binary covariate [Negative or Positive]) (**for analysis Group A only**);
- HER2 status (fitted as a binary covariate [Negative or Positive]) (**for analysis Group A only**);

For the comparisons i) to iv) above, we fitted a multivariable model for OS and DDFS, comparing BRCA+ versus BRCA-, adjusting for the following covariates:

- Age at diagnosis, in years (fitted as a continuous covariate);
- Body Mass Index (fitted as a categorical covariate [Underweight/Healthy, Overweight or Obese]);
- Histological Grade (fitted as a categorical covariate [1, 2 or 3]);
- Maximum invasive tumour size, in mm (fitted as a continuous covariate);
- N stage (fitted as a binary covariate [N0 or N1]);
- ER status (fitted as a binary covariate [Negative or Positive]) **(for analysis Group A only)**;
- HER2 status (fitted as a binary covariate [Negative or Positive]) **(for analysis Group A only)**;
- Ethnicity (fitted as a categorical covariate [Caucasian, Black or Asian]) – *where appropriate*;
- Diagnosis Year (fitted as a binary covariate [ $\leq 2005$ , or  $>2005$ ]) – *where appropriate*;
- Adjuvant or neo-adjuvant chemotherapy indicator (fitted as a binary covariate [yes, or no/missing/unknown]) – *where appropriate*;
- Chemotherapy with taxane indicator (fitted as a binary covariate [yes-with taxane, or no-without taxane]) – *where appropriate*.

### Hazard Ratios

Evidence suggests that the effect of ER status changes over time (Azzato, et al, 2009, Bellera et al, 2010)<sup>1</sup>. Indeed, this was evident after testing the proportional hazards assumption based on the Schoenfeld residuals and using the identity matrix for the time-scaling function<sup>2</sup> i.e. using the `estat phtest` command in STATA. This result provided strong evidence against the Cox proportional hazards assumption ( $p < 0.001$ ), which was also seen when plotting the scaled Schoenfeld residuals over time<sup>2</sup>.

As a result of the time-varying effects of the ER status, a flexible parametric survival model was programmed in STATA using the `stpm2` command (Lambert, Royston, 2009)<sup>3</sup> to model ER as a time-dependent covariate. The degrees of freedom for the restricted cubic spline function used for the hazard rate was set to the default setting of 3, whilst the degrees of freedom for the time-dependent effects was set so as to provide the lowest Akaike information criterion (AIC) and Bayesian information criterion (BIC). The time-varying hazard ratio and 95% confidence interval was plotted over time and 2-, 5-, and 8-year relative hazard ratios and survival estimates were produced.

<sup>1</sup>The Azzato, et al paper can be found at <http://www.ncbi.nlm.nih.gov/pmc/articles/PMC2695697/>. The Bellera et al paper can be found at <http://www.biomedcentral.com/1471-2288/10/20>.

<sup>2</sup>Results obtained from T Maishman's MSc Project analysis undertaken on POSH data downloaded in May 2011.

<sup>3</sup>The Lambert & Royston paper can be found at [www.stata-journal.com/article.html?article=st0165](http://www.stata-journal.com/article.html?article=st0165) or [http://www.pauldickman.com/cancerepi/handouts/handouts\\_survival/Lambert2009.pdf](http://www.pauldickman.com/cancerepi/handouts/handouts_survival/Lambert2009.pdf)

### **Method used to handle missing data**

The amount of missingness will be investigated and if deemed appropriate, methods of multiple imputation will be incorporated. Otherwise, a complete-case analysis approach will be incorporated.

**To date, between 20-22% of patients have are missing data for at least 1 covariate in the multivariable models.**

## Appendix Document 2: STROBE Checklist

Strengthening the Reporting of Observational Studies in Epidemiology (STROBE) checklist.

|                           | Item No. | Recommendation                                                                                                                                                                             | Page No.  | Relevant text from manuscript              |
|---------------------------|----------|--------------------------------------------------------------------------------------------------------------------------------------------------------------------------------------------|-----------|--------------------------------------------|
| <b>Title and abstract</b> | 1        | (a) Indicate the study's design with a commonly used term in the title or the abstract                                                                                                     | 1 (and 3) | Within the title (1) and abstract (3)      |
|                           |          | (b) Provide in the abstract an informative and balanced summary of what was done and what was found                                                                                        | 3         | Within the abstract (Methods and Findings) |
| <b>Introduction</b>       |          |                                                                                                                                                                                            |           |                                            |
| Background/rationale      | 2        | Explain the scientific background and rationale for the investigation being reported                                                                                                       | 4-5       | Within the Background                      |
| Objectives                | 3        | State specific objectives, including any prespecified hypotheses                                                                                                                           | 5         | Within the Background                      |
| <b>Methods</b>            |          |                                                                                                                                                                                            |           |                                            |
| Study design              | 4        | Present key elements of study design early in the paper                                                                                                                                    | 5         | Within the Background and Methods          |
| Setting                   | 5        | Describe the setting, locations, and relevant dates, including periods of recruitment, exposure, follow-up, and data collection                                                            | 5-7       | Within the Methods                         |
| Participants              | 6        | (a) <i>Cohort study</i> —Give the eligibility criteria, and the sources and methods of selection of participants. Describe methods of follow-up                                            | 5-6       | Within the Methods                         |
|                           |          | <i>Case-control study</i> —Give the eligibility criteria, and the sources and methods of case ascertainment and control selection. Give the rationale for the choice of cases and controls |           |                                            |
|                           |          | <i>Cross-sectional study</i> —Give the eligibility criteria, and the sources and methods of selection of participants                                                                      |           |                                            |
| Variables                 | 7        | (b) <i>Cohort study</i> —For matched studies, give matching criteria and number of exposed and unexposed                                                                                   | N/A       | N/A                                        |
|                           |          | <i>Case-control study</i> —For matched studies, give matching criteria and the number of controls per case                                                                                 |           |                                            |
| Variables                 | 7        | Clearly define all outcomes, exposures, predictors, potential confounders, and effect modifiers. Give diagnostic criteria, if applicable                                                   | 5-8       | Within the Methods                         |
| Data sources/ measurement | 8*       | For each variable of interest, give sources of data and details of methods of assessment (measurement). Describe comparability of assessment methods if there is more than one group       | 5-7       | Within the Methods                         |
| Bias                      | 9        | Describe any efforts to address potential sources of bias                                                                                                                                  | 8         | Within the Methods                         |
| Study size                | 10       | Explain how the study size was arrived at                                                                                                                                                  | 7         | Within the Methods                         |

Continued on next page

|                        |     |                                                                                                                                                                                                                                                                                                           |                                                             |                                                                             |
|------------------------|-----|-----------------------------------------------------------------------------------------------------------------------------------------------------------------------------------------------------------------------------------------------------------------------------------------------------------|-------------------------------------------------------------|-----------------------------------------------------------------------------|
| Quantitative variables | 11  | Explain how quantitative variables were handled in the analyses. If applicable, describe which groupings were chosen and why                                                                                                                                                                              | 7-8                                                         | Within the Methods                                                          |
| Statistical methods    | 12  | (a) Describe all statistical methods, including those used to control for confounding                                                                                                                                                                                                                     | 7-8                                                         | Within the Methods                                                          |
|                        |     | (b) Describe any methods used to examine subgroups and interactions                                                                                                                                                                                                                                       | 7-8                                                         | Within the Methods                                                          |
|                        |     | (c) Explain how missing data were addressed                                                                                                                                                                                                                                                               | 8                                                           | Within the Methods                                                          |
|                        |     | (d) <i>Cohort study</i> —If applicable, explain how loss to follow-up was addressed<br><i>Case-control study</i> —If applicable, explain how matching of cases and controls was addressed<br><i>Cross-sectional study</i> —If applicable, describe analytical methods taking account of sampling strategy | 8                                                           | Within the Methods                                                          |
|                        |     | (e) Describe any sensitivity analyses                                                                                                                                                                                                                                                                     | 8                                                           | Within the Methods                                                          |
| <b>Results</b>         |     |                                                                                                                                                                                                                                                                                                           |                                                             |                                                                             |
| Participants           | 13* | (a) Report numbers of individuals at each stage of study—eg numbers potentially eligible, examined for eligibility, confirmed eligible, included in the study, completing follow-up, and analysed                                                                                                         | 8-9 & Appendix Figure 1                                     | Within the Results & Appendix Figure 1                                      |
|                        |     | (b) Give reasons for non-participation at each stage                                                                                                                                                                                                                                                      | 8-9 & Appendix Figure 1                                     | Within the Results & Appendix Figure 1                                      |
|                        |     | (c) Consider use of a flow diagram                                                                                                                                                                                                                                                                        | Appendix Figure 1                                           | Within Appendix Figure 1                                                    |
| Descriptive data       | 14* | (a) Give characteristics of study participants (eg demographic, clinical, social) and information on exposures and potential confounders                                                                                                                                                                  | 8-9, Tables 1 & 2, Appendix Figure 1                        | Within the Results, Tables 1 & 2, & Appendix Figure 1                       |
|                        |     | (b) Indicate number of participants with missing data for each variable of interest                                                                                                                                                                                                                       | Tables 1 & 2                                                | Within the Tables 1 & 2                                                     |
|                        |     | (c) <i>Cohort study</i> —Summarise follow-up time (eg, average and total amount)                                                                                                                                                                                                                          | 9                                                           | Within the Results                                                          |
| Outcome data           | 15* | <i>Cohort study</i> —Report numbers of outcome events or summary measures over time                                                                                                                                                                                                                       | 9-10, Figures 1 & 2, Appendix Figures 2, 3, 4, 5, 6, 8, & 9 | Within the Results, Figures 1 & 2, & Appendix Figures 2, 3, 4, 5, 6, 8, & 9 |
|                        |     | <i>Case-control study</i> —Report numbers in each exposure category, or summary measures of exposure                                                                                                                                                                                                      | N/A                                                         | N/A                                                                         |
|                        |     | <i>Cross-sectional study</i> —Report numbers of outcome events or summary measures                                                                                                                                                                                                                        | N/A                                                         | N/A                                                                         |
| Main results           | 16  | (a) Give unadjusted estimates and, if applicable, confounder-adjusted estimates and their precision (eg, 95% confidence interval). Make clear which confounders were adjusted for and why they were included                                                                                              | 9-11, Figures 1 & 2, Appendix Figures 2, 3, 4, 5, 6, 8, & 9 | Within the Results, Figures 1 & 2, & Appendix Figures 2, 3, 4, 5, 6, 8, & 9 |
|                        |     | (b) Report category boundaries when continuous variables were categorized                                                                                                                                                                                                                                 | Tables 1 & 2                                                | Within Tables 1 & 2                                                         |
|                        |     | (c) If relevant, consider translating estimates of relative risk into absolute risk for a meaningful time period                                                                                                                                                                                          | N/A                                                         | N/A                                                                         |

Continued on next page

|                          |    |                                                                                                                                                                            |                               |                                                                                                   |
|--------------------------|----|----------------------------------------------------------------------------------------------------------------------------------------------------------------------------|-------------------------------|---------------------------------------------------------------------------------------------------|
| Other analyses           | 17 | Report other analyses done—eg analyses of subgroups and interactions, and sensitivity analyses                                                                             | 10-11, Appendix Figures 8 & 9 | Within the Results and Appendix Figures 8 & 9 for post-hoc analyses results                       |
| <b>Discussion</b>        |    |                                                                                                                                                                            |                               |                                                                                                   |
| Key results              | 18 | Summarise key results with reference to study objectives                                                                                                                   | 11-13                         | Within the Discussion                                                                             |
| Limitations              | 19 | Discuss limitations of the study, taking into account sources of potential bias or imprecision. Discuss both direction and magnitude of any potential bias                 | 14-15                         | Within the Discussion                                                                             |
| Interpretation           | 20 | Give a cautious overall interpretation of results considering objectives, limitations, multiplicity of analyses, results from similar studies, and other relevant evidence | 15                            | Within the Discussion                                                                             |
| Generalisability         | 21 | Discuss the generalisability (external validity) of the study results                                                                                                      | 13-15                         | Within the Discussion                                                                             |
| <b>Other information</b> |    |                                                                                                                                                                            |                               |                                                                                                   |
| Funding                  | 22 | Give the source of funding and the role of the funders for the present study and, if applicable, for the original study on which the present article is based              | 4, 8, 16                      | Within the Funding section following the abstract, within the Methods and within Acknowledgements |

\*Give information separately for cases and controls in case-control studies and, if applicable, for exposed and unexposed groups in cohort and cross-sectional studies.

**Note:** An Explanation and Elaboration article discusses each checklist item and gives methodological background and published examples of transparent reporting. The STROBE checklist is best used in conjunction with this article (freely available on the Web sites of PLoS Medicine at <http://www.plosmedicine.org/>, Annals of Internal Medicine at <http://www.annals.org/>, and Epidemiology at <http://www.epidem.com/>). Information on the STROBE Initiative is available at [www.strobe-statement.org](http://www.strobe-statement.org).



**Appendix Figure 10 – Time-varying effects of BRCA status on Overall Survival for all TNBC patients (TNBC population)**

Time-varying hazard rates by BRCA1 and/or 2 status (BRCA+/-) for Overall Survival (OS) (Panel A); and corresponding time-varying hazard ratio for Overall Survival (Panel B).

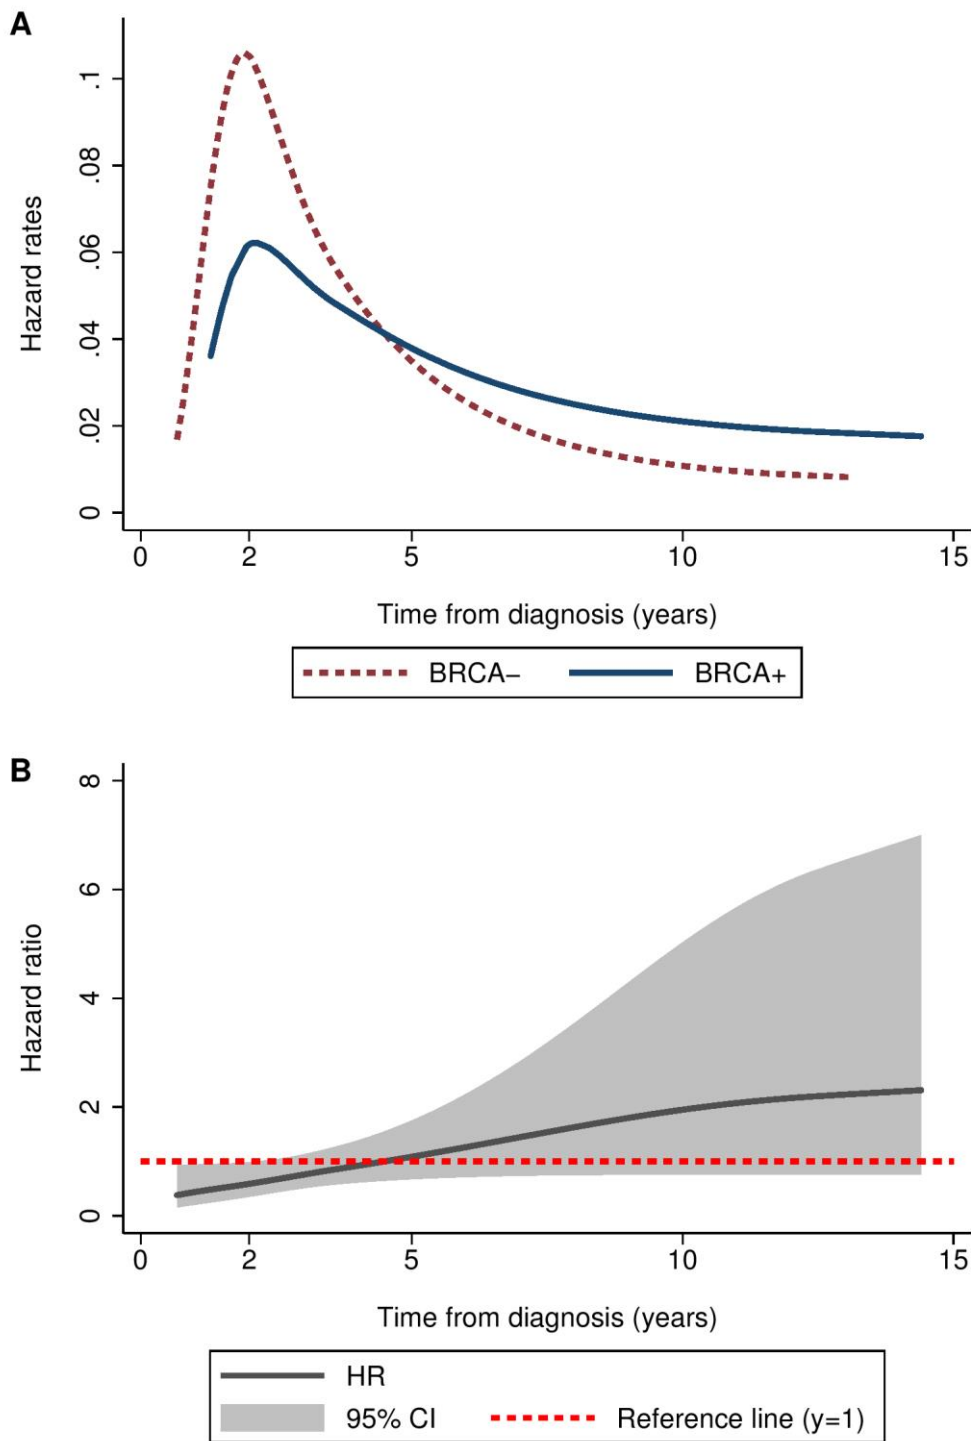

Supplement: mmc1.pdf [file mmc1.pdf]
